# Supplementary material for: PipeCoV: a pipeline for SARS-CoV-2 genome assembly, annotation and variant identification
Source: PeerJ. 2022 Apr 13;10:e13300. doi: 10.7717/peerj.13300 (PMC9013232; doi:10.7717/peerj.13300)
Supplement: Supplemental Information 1 [file peerj-10-13300-s001.xlsx]

## Sheet: Benchmarking
supplementary material - PipeCOV
Total sequences:	120 illumina sequenced samples (https://www.microbiologyresearch.org/content/journal/jgv/10.1099/jgv.0.001562).
We have 5 pipelines for comparison, with PipeCOV running 3 times. First without the gapcloser, we call it Pipecov. Second with Gapcloser with parameter l-20, we call it PIPECOV GapCloser. Finally, the PipeCOV with parameter l-100, we call PIPECOV GapCloser l100 (gray).
	Samples that generated consensus					Size of consensus							Number of Ns							Amount of gaps (when aligning against the reference genome using Nextclade)							% genome coverage (Quast)							Found variants (pangolin)
Samples	PIPECOV	Viralrecon	V-pipe	Signal	CLC	PIPECOV	PIPECOV GapCloser	PIPECOV GapCloser l100	Viralrecon	V-pipe	Signal	CLC	PIPECOV	PIPECOV GapCloser	PIPECOV GapCloser l100	Viralrecon	V-pipe	Signal	CLC	PIPECOV	PIPECOV GapCloser	PIPECOV GapCloser l100	Viralrecon	V-pipe	Signal	CLC	PIPECOV	PIPECOV GapCloser	PIPECOV GapCloser l100	Viralrecon	V-pipe	Signal	CLC	PIPECOV	PIPECOV GapCloser	PIPECOV GapCloser l100	Viralrecon	V-pipe	Signal	CLC
SRR13418674	1	1	1	1	1	29877	29854	29817	29850	29903	29903	29850	499	364	319	1005	700	676	2221	8	24	24	0	0	0	0	98.706	99.054	98.93	97.164	97.572	98.318	92.375	B.1.1.8	B.1.1.8	B.1.1.8	B.1.1.8	B.1.1.8	B.1.1.8	B.1.1.8
SRR13418675	1	1	1	1	1	29873	29874	29831	29857	29903	29903	29857	97	79	78	151	321	192	343	0	0	5	0	0	0	0	99.9	99.9	99.776	99.676	98.927	99.692	99.167	B.1.1.306	B.1.1.306	B.1.1.306	B.1.1.306	B.1.1.306	B.1.1.306	B.1.1.306
SRR13418676	1	1	1	1	1	29837	29819	29818	29850	29903	29903	29850	90	6	6	87	320	148	241	0	19	20	0	0	0	0	99.779	99.779	99.779	99.776	98.93	99.732	99.194	B.1.1.8	B.1.1.8	B.1.1.8	B.1.1.8	B.1.1.8	B.1.1.8	B.1.1.8
SRR13418677	1	1	1	1	1	29873	29668	29631	29836	29903	29903	29836	1875	1082	1082	2373	1362	2376	3975	0	218	218	0	0	0	0	93.75	95.228	95.104	91.737	95.382	91.482	86.737	B.1.1.8	B.1.1.8	B.1.1.8	B.1.1.8	B.1.1.8	B.1.1.8	B.1.1.8
SRR13418678	1	1	1	1	1	29873	29857	29820	29836	29903	29903	29836	538	339	339	495	890	582	1290	0	26	26	0	0	0	0	98.365	98.86	98.736	98.198	97.024	98.198	96.275	B.1.1.8	B.1.1.8	B.1.1.8	B.1.1.8	B.1.1.8	B.1.1.8	B.1.1.8
SRR13418679	1	1	1	1	1	29889	29889	29837	29811	29903	29903	29811	2230	1533	1407	2583	2373	2673	4620	0	18	6	0	0	0	0	92.83	95.452	95.516	91.466	91.897	91.218	84.777	B.1.1.306	B.1.1.306	B.1.1.306	B.1.1.306	B.1.1.306	B.1.1.306	B.1.1.306
SRR13418680	1	1	1	1	1	29836	29831	29830	29819	29903	29903	29819	1056	598	128	1454	1189	264	1200	0	9	9	0	0	0	0	96.579	98.174	99.291	94.753	96.024	99.117	96.231	B.1.1.8	B.1.1.8	B.1.1.8	B.1.1.8	B.1.1.8	B.1.1.8	B.1.1.8
SRR13418681	1	1	1	1	1	29873	29857	29838	29891	29903	29903	29891	1274	793	791	1676	1089	1651	2946	0	18	1	0	0	0	0	95.97	97.559	97.435	94.355	96.572	94.181	90.205	B.1.1.306	B.1.1.306	B.1.1.306	B.1.1.306	B.1.1.306	B.1.1.306	B.1.1.306
SRR13418682	1	1	1	1	1	29888	29890	29833	29850	29903	29903	29850	79	2	1	44	90	92	314	0	0	5	0	0	0	0	99.903	99.903	99.779	99.676	99.793	99.692	99.167	B.1.1.306	B.1.1.306	B.1.1.306	B.1.1.306	B.1.1.306	B.1.1.306	B.1.1.306
SRR13418683	1	1	1	1	1	29891	29715	29660	29807	29903	29903	29807	1665	893	914	2245	1861	2148	3946	0	191	178	0	0	0	0	94.409	96.716	96.783	92.362	94.389	92.917	86.928	B.1.1.8	B.1.1.8	B.1.1.8	B.1.1.8	B.1.1.8	B.1.1.8	B.1.1.8
SRR13418684	1	1	1	1	1	29873	29846	29809	29811	29903	29903	29811	734	421	355	1038	615	1137	2486	0	30	30	0	0	0	0	97.341	99.05	98.927	96.221	98.572	95.81	91.797	B.1.1.8	B.1.1.8	B.1.1.8	B.1.1.8	B.1.1.8	B.1.1.8	B.1.1.8
SRR13418685	1	1	1	1	1	29873	29870	29832	29837	29903	29903	29837	597	327	290	807	321	834	1831	0	9	9	0	0	0	0	98.074	99.05	98.927	97.081	98.927	97.064	93.85	B.1.1.306	B.1.1.306	B.1.1.306	B.1.1.306	B.1.1.306	B.1.1.306	B.1.1.306
SRR13418686	1	1	1	1	1	29873	29855	29818	29863	29903	29904	29863	101	12	6	166	321	191	249	0	18	19	0	0	0	0	99.896	99.896	99.776	99.308	98.927	99.361	99.167	B.1.1.8	B.1.1.8	B.1.1.8	B.1.1.8	B.1.1.8	B.1.1.8	B.1.1.8
SRR13418687	1	1	1	1	1	29869	28802	28859	29834	29903	29900	29834	4385	2612	2655	5121	3763	4995	9183	4			3	0	3	3	85.476	87.607	87.707	83.139	86.881	82.995	69.01	B.1.1.8	B.1.1.8	B.1.1.8	B.1.1.8	B.1.1.8	B.1.1.8	B.1.1.8
SRR13418688	1	1	1	1	1	29874	29723	29641	29838	29903	29904	29838	1630	916	863	2046	1116	2031	3499	0		204	0	0	0	0	94.853	96.412	96.917	93.064	96.572	93.425	89.001	B.1.1.8	B.1.1.8	B.1.1.8	B.1.1.8	B.1.1.8	B.1.1.8	B.1.1.8
SRR13418689	1	1	1	1	1	29836	29825	29827	29848	29903	29903	29848	681	397	339	901	636	927	2664	0	11	9	0	0	0	0	97.95	98.475	98.927	97.034	97.729	97.121	90.723	B.1.1.8	B.1.1.8	B.1.1.8	B.1.1.8	B.1.1.8	B.1.1.8	B.1.1.8
SRR13418690	1	1	1	1	1	30046	29880	29832	29836	29903	29903	29836	1015	383	394	1114	687	1071	2364	0	0	6	0	0	0	0	97.338	98.769	99.274	96.097	97.729	96.612	91.911	B.1.1.306	B.1.1.306	B.1.1.306	B.1.1.306	B.1.1.306	B.1.1.306	B.1.1.306
SRR13418691	1	1	1	1	1	29873	29687	29650	29873	29903	29903	29873	2638	1640	1584	3217	2044	3152	5034	0	188	188	0	0	0	0	91.121	94.255	94.318	89.142	93.124	88.874	83.119	B.1.1.8	B.1.1.8	B.1.1.8	B.1.1.8	B.1.1.8	B.1.1.8	B.1.1.8
SRR13418692	1	1	1	1	1	29877	29871	29834	29835	29903	29903	29835	351	236	198	543	509	540	1325	8	14	6	0	0	0	0	98.605	99.395	99.217	98.044	98.298	98.127	95.85	B.1.1.306	B.1.1.306	B.1.1.306	B.1.1.306	B.1.1.306	B.1.1.306	B.1.1.306
SRR13418693	1	1	1	1	1	29873	29862	29825	29850	29903	29903	29850	133	122	141	335	321	289	1208	0	11	11	0	0	0	0	99.505	99.505	99.318	98.743	98.927	99.141	95.716	B.1.1.8	B.1.1.8	B.1.1.8	B.1.1.8	B.1.1.8	B.1.1.8	B.1.1.8
SRR13418694	1	1	1	1	1	29836	29831	29831	29857	29903	29903	29857	119	106	106	179	319	205	1181	0	5	5	0	0	0	0	99.421	99.421	99.421	99.248	98.933	99.314	96.007	B.1.1.306	B.1.1.306	B.1.1.306	B.1.1.306	B.1.1.306	B.1.1.306	B.1.1.306
SRR13418695	1	1	1	1	1	29872	29802	29722	29836	29903	29903	29836	641	512	313	1025	473	957	2492	0	91	135	0	0	0	0	97.863	97.853	98.545	96.515	98.298	96.666	91.887	B.1.1.8	B.1.1.8	B.1.1.8	B.1.1.8	B.1.1.8	B.1.1.8	B.1.1.8
SRR13418696	1	1	1	1	1	29873	29867	29830	29859	29903	29903	29859	116	106	106	181	321	212	642	0	6	6	0	0	0	0	99.545	99.545	99.421	99.248	98.927	99.291	98.592	B.1.1.306	B.1.1.306	B.1.1.306	B.1.1.306	B.1.1.306	B.1.1.306	B.1.1.306
SRR13418697	1	1	1	1	1	29873	29029	28992	29849	29903	29903	29849	9063	6102	6356	10194	7817	10260	14965	0			0	0	0	0	69.117	75.842	76.608	66.258	73.712	65.134	49.059	B.1.1.8	B.1.1.8	B.1.1.8	B.1.1.8	B.1.1.8	B.1.1.8	B.1
SRR13418698	1	1	1	1	1	29866	29864	29827	29822	29903	29888	29822	98	0	0	141	333	182	404	7	15	15	15	0	15	15	99.9	99.9	99.776	99.308	98.927	99.328	98.776	B.1.1.8	B.1.1.8	B.1.1.8	B.1.1.8	B.1.1.8	B.1.1.8	B.1.1.8
SRR13418699	1	1	1	1	1	29873	29869	29832	29840	29903	29903	29840	524	372	317	641	538	670	1615	0	13	5	0	0	0	0	98.04	99.05	98.927	97.646	98.151	97.495	94.335	B.1.1.306	B.1.1.306	B.1.1.306	B.1.1.306	B.1.1.306	B.1.1.306	B.1.1.306
SRR13418700	1	1	1	1	1	29873	29909	29872	29807	29903	29903	29807	1225	711	601	1508	1118	1617	2713	0	8	8	0	0	0	0	95.629	97.241	97.746	94.636	96.86	94.395	91.135	B.1.1.306	B.1.1.306	B.1.1.306	B.1.1.306	B.1.1.306	B.1.1.306	B.1.1.306
SRR13418701	1	1	1	1	1	29873	29211	29014	29806	29903	29903	29806	2982	1533	1455	3517	2098	3538	6225	0			0	0	0	0	90.442	92.9	92.743	87.877	92.974	87.704	78.945	B.1.1.306	B.1.1.306	B.1.1.306	B.1.1.306	B.1.1.306	B.1.1.306	B.1.1.306
SRR13418702	1	1	1	1	1	29873	28854	28837	29835	29903	29903	29835	4169	2267	2092	5284	3095	4999	8504	0			0	0	0	0	85.991	89.295	89.757	82.363	89.108	82.614	70.969	B.1.441	B.1.441	B.1.441	B.1.441	B.1.441	B.1.441	B.1.441
SRR13418703	1	1	1	1	1	29873	29622	29644	29836	29903	29903	29836	4820	3984	3891	5793	4342	5560	9012	3	260	194	0	0	0	0	85.062	86.7	86.423	80.845	85.195	82.032	70.09	B.1.1.8	B.1.1.8	B.1.1.8	B.1.1.8	B.1.1.8	B.1.1.8	B.1.1.8
SRR13418704	1	1	1	1	1	29873	29534	29517	29874	29903	29903	29874	3688	2464	2385	4489	3005	4321	7550	3	379	355	0	0	0	0	87.553	91.168	91.299	85.129	89.289	85.821	74.3	B.1.1.8	B.1.1.8	B.1.1.8	B.1.1.8	B.1.1.8	B.1.1.8	B.1.1.8
SRR13418705	1	1	1	1	1	29873	29340	29359	29836	29903	29903	29836	3126	2063	1973	3635	2021	3672	6199	0			0	0	0	0	89.897	91.165	91.737	87.851	92.961	88.018	79.316	B.1.1.8	B.1.1.8	B.1.1.8	B.1.1.8	B.1.1.8	B.1.1.8	B.1.1.8
SRR13418706	1	1	1	1	1	29873	29117	29138	29807	29903	29903	29807	3828	2484	2263	4555	3181	4533	7339	0			0	0	0	0	87.623	89.426	90.376	84.587	89.369	85.339	75.471	B.1.1.8	B.1.1.8	B.1.1.8	B.1.1.8	B.1.1.8	B.1.1.8	B.1.1.8
SRR13418707	1	1	1	1	1	29836	29840	29840	29849	29903	29903	29849	33	0	0	151	321	122	242	0	0	0	0	0	0	0	99.776	99.776	99.776	99.314	98.927	99.676	99.191	B.1.195	B.1.195	B.1.195	B.1.195	B.1.195	B.1.195	B.1.195
SRR13418708	1	1	1	1	1	29880	29875	29831	29864	29903	29903	29864	117	106	106	186	321	207	516	0	5	5	0	0	0	0	99.545	99.545	99.421	99.248	98.927	99.308	98.592	B.6.6	B.6.6	B.6.6	B.6.6	B.6.6	B.6.6	B.6.6
SRR13418709	1	1	1	1	1	29873	29863	29826	29837	29903	29903	29837	1713	1406	1445	2179	1683	2160	4109	0	10	10	0	0	0	0	94.067	94.91	94.877	92.666	94.372	92.86	86.697	B.6.6	B.6.6	B.6.6	B.6.6	B.6.6	B.6.6	B.6.6
SRR13418710	1	1	1	1	1	29873	29858	29820	29835	29903	29903	29835	553	392	391	825	618	815	2363	0	21	21	0	0	0	0	97.856	98.485	98.361	97.298	97.779	97.141	92.242	B.6.6	B.6.6	B.6.6	B.6.6	B.6.6	B.6.6	B.6.6
SRR13418711	1	1	1	1	1	29872	29858	29821	29849	29903	29903	29849	1732	1315	1250	2304	1617	2199	3469	1	63	29	0	0	0	0	94.914	95.318	95.713	92.242	94.79	93.041	88.737	B.6.6	B.6.6	B.6.6	B.6.6	B.6.6	B.6.6	B.6.6
SRR13418712	1	1	1	1	1	29873	29694	29657	29835	29903	29903	29835	3189	2267	2200	4215	2741	3947	8197	3	213	200	0	0	0	0	89.794	91.961	92.342	85.851	90.834	86.968	72.524	B.1.1.8	B.1.1.8	B.1.1.8	B.1.1.8	B.1.1.8	B.1.1.8	B.1.1.8
SRR13418713	1	1	1	1	1	29873	29281	29244	29806	29903	29903	29806	2165	1062	1042	2756	1401	2765	4957	0			0	0	0	0	93.027	94.706	95.027	90.282	95.208	90.891	83.968	B.6	B.6	B.6	B.6	B.6	B.6	B.6
SRR13418714	1	1	1	1	1	29873	29869	29832	29838	29903	29903	29838	535	279	246	733	590	802	1369	0	11	6	0	0	0	0	98.074	99.224	99.211	97.522	97.729	97.428	95.342	B.4	B.4	B.4	B.4	B.4	B.4	B.4
SRR13418715	1	1	1	1	1	29868	29798	29796	29849	29903	29903	29849	1324	708	695	1751	634	1619	2976	0	52	46	0	0	0	0	96.549	97.907	98.131	94.121	97.729	95.004	90.215	B.6.6	B.6.6	B.6.6	B.6.6	B.6.6	B.6.6	B.6.6
SRR13418716	1	1	1	1	1	29876	29868	29819	29855	29903	29903	29855	77	55	54	135	316	143	480	0	11	18	0	0	0	0	99.903	99.91	99.779	99.676	98.943	99.692	98.592	B.1.1.306	B.1.1.306	B.1.1.306	B.1.1.306	B.1.1.306	B.1.1.306	B.1.1.306
SRR13418717	1	1	1	1	1	29873	29842	29796	29836	29903	29903	29836	983	631	272	1408	799	1335	1789	0	33	42	0	0	0	0	97.726	98.539	99.211	95.372	97.606	96.719	94.914	B.1.1.306	B.1.1.306	B.1.1.306	B.1.1.306	B.1.1.306	B.1.1.306	B.1.1.306
SRR13418718	1	1	1	1	1	29888	29880	29828	29850	29903	29903	29850	82	1	1	113	321	181	421	0	9	9	0	0	0	0	99.903	99.903	99.776	99.759	98.927	99.699	98.592	B.1.1.306	B.1.1.306	B.1.1.306	B.1.1.306	B.1.1.306	B.1.1.306	B.1.1.306
SRR13418719	1	1	1	1	1	29888	29880	29828	29860	29903	29903	29860	72	1	1	145	321	176	299	0	9	9	0	0	0	0	99.9	99.9	99.776	99.676	98.927	99.682	99.595	B.1.1.306	B.1.1.306	B.1.1.306	B.1.1.306	B.1.1.306	B.1.1.306	B.1.1.306
SRR13418720	1	1	1	1	1	29840	29868	29831	29861	29903	29903	29861	79	69	69	331	308	131	421	0	9	9	0	0	0	0	99.779	99.913	99.789	98.753	98.97	99.756	98.592	B.1.1.306	B.1.1.306	B.1.1.306	B.1.1.306	B.1.1.306	B.1.1.306	B.1.1.306
SRR13418721	1	1	1	1	1	29874	29847	29810	29838	29903	29903	29838	548	403	366	1143	541	771	2454	0	30	30	0	0	0	0	99.054	99.054	98.93	96.352	98.93	98.676	92.549	B.1.1.306	B.1.1.306	B.1.1.306	B.1.1.306	B.1.1.306	B.1.1.306	B.1.1.306
SRR13418722	1	1	1	1	1	29866	29831	29794	29836	29903	29903	29836	1782	1038	918	2388	1446	2239	3606	11	49	46	0	0	0	0	94.857	96.622	97.161	91.984	95.823	93.014	89.369	B.1.1.8	B.1.1.8	B.1.1.8	B.1.1.8	B.1.1.8	B.1.1.8	B.1.1.8
SRR13418723	1	1	1	1	1	29874	29866	29829	29841	29903	29903	29841	85	1	1	151	320	150	430	0	9	9	0	0	0	0	99.903	99.903	99.779	99.224	98.93	99.692	98.963	B.1.1.306	B.1.1.306	B.1.1.306	B.1.1.306	B.1.1.306	B.1.1.306	B.1.1.306
SRR13418724	1	1	1	1	1	29893	29882	29829	29841	29903	29903	29841	149	116	116	260	320	194	479	0	9	9	0	0	0	0	99.442	99.518	99.395	98.85	98.93	99.401	98.592	B.1.1.306	B.1.1.306	B.1.1.306	B.1.1.306	B.1.1.306	B.1.1.306	B.1.1.306
SRR13418725	1	1	1	1	1	29891	29897	29832	29807	29903	29903	29807	1388	813	702	2392	1093	1847	3926	0	0	9	0	0	0	0	96.923	97.355	97.86	91.643	96.753	95.562	88.499	B.1.1.8	B.1.1.8	B.1.1.8	B.1.1.8	B.1.1.8	B.1.1.8	B.1.1.8
SRR13418726	1	1	1	1	1	29873	29853	29816	29807	29903	29903	29807	548	397	329	890	667	787	1884	0	21	21	0	0	0	0	98.482	99.05	98.927	97.03	97.997	97.943	95.111	B.1.1.306	B.1.1.306	B.1.1.306	B.1.1.306	B.1.1.306	B.1.1.306	B.1.1.306
SRR13418727	1	1	1	1	1	29873	29848	29804	29835	29903	29903	29835	1492	1211	1059	2627	950	1828	3266	0	35	40	0	0	0	0	95.813	96.592	96.572	90.807	97.479	94.382	90.376	B.1.1.8	B.1.1.8	B.1.1.8	B.1.1.8	B.1.1.8	B.1.1.8	B.1.1.8
SRR13418728	1	1	0	1	1	29825	29826	29796	29827	29903	29903	29827	1297	405	511	2641	29903	1471	3323	0	0	12	0	-	0	0	95.592	98.388	98.328	91.329	-	95.198	89.733	B.1.1.306	B.1.1.306	B.1.1.306	B.1.1.306	None	B.1.1.306	B.1.1.306
SRR13418729	1	1	1	1	1	30028	29877	29839	29836	29903	29903	29836	1460	1032	992	2560	1150	1895	3635	0	15	17	0	0	0	0	96.211	96.402	96.465	91.218	96.589	94.683	88.61	B.1.1.8	B.1.1.8	B.1.1.8	B.1.1.8	B.1.1.8	B.1.1.8	B.1.1.8
SRR13418730	1	1	1	1	1	29876	29876	29831	29859	29903	29903	29859	73	5	0	271	307	133	421	0	0	9	0	0	0	0	99.9	99.91	99.789	98.913	98.973	99.722	98.592	B.1.1.8	B.1.1.8	B.1.1.8	B.1.1.8	B.1.1.8	B.1.1.8	B.1.1.8
SRR13418731	1	1	1	1	1	29878	29878	29827	29836	29903	29903	29836	88	4	0	306	321	154	537	0	0	9	0	0	0	0	99.9	99.9	99.776	98.753	98.927	99.679	98.592	B.1.1.8	B.1.1.8	B.1.1.8	B.1.1.8	B.1.1.8	B.1.1.8	B.1.1.8
SRR13418732	1	1	1	1	1	29885	29877	29831	29861	29903	29903	29861	83	68	67	146	321	139	281	4	12	9	0	0	0	0	99.903	99.913	99.789	99.676	98.927	99.749	99.06	B.1.1.8	B.1.1.8	B.1.1.8	B.1.1.8	B.1.1.8	B.1.1.8	B.1.1.8
SRR13418733	1	1	1	1	1	29873	29842	29805	29837	29903	29903	29837	738	528	471	1103	679	962	2368	0	45	35	0	0	0	0	97.853	98.037	98.358	96.418	97.729	97.144	93.472	B.1.1.8	B.1.1.8	B.1.1.8	B.1.1.8	B.1.1.8	B.1.1.8	B.1.1.8
SRR13418734	1	1	1	1	1	29873	29866	29830	29837	29903	29903	29837	841	596	487	1650	787	1162	2733	0	12	10	0	0	0	0	97.853	97.853	98.358	94.619	97.368	97.141	92.108	B.1.1.306	B.1.1.306	B.1.1.306	B.1.1.306	B.1.1.306	B.1.1.306	B.1.1.306
SRR13418735	1	1	1	1	1	29888	29878	29829	29841	29903	29903	29841	205	150	147	690	321	328	1211	4	16	11	0	0	0	0	99.448	99.498	99.375	97.482	98.927	99.194	96.449	B.1.1.8	B.1.1.8	B.1.1.8	B.1.1.8	B.1.1.8	B.1.1.8	B.1.1.8
SRR13418736	1	1	1	1	1	29871	29876	29838	29806	29903	29903	29806	4120	3341	3435	5606	3299	4941	7566	5			0	0	0	0	88.285	89.449	89.389	81.109	89.998	85.149	76.751	B.1.1.8	B.1.1.8	B.1.1.8	B.1.1.8	B.1.1.8	B.1.1.8	B.1.1.8
SRR13418737	1	1	1	1	1	29873	29876	29838	29836	29903	29903	29836	2503	1594	2020	3715	2018	2948	5284	0	91	10	0	0	0	0	91.931	93.703	93.579	87.376	93.489	90.559	83.634	B.1.1.8	B.1.1.8	B.1.1.8	B.1.1.8	B.1.1.8	B.1.1.8	B.1.1.8
SRR13418738	1	1	1	1	1	29872	29861	29823	29879	29903	29903	29879	1887	1300	1206	2994	1736	2729	4543	4	22	0	0	0	0	0	95.101	96.064	96.251	90.141	95.044	91.717	86.439	B.1.1.8	B.1.1.8	B.1.1.8	B.1.1.8	B.1.1.8	B.1.1.8	B.1.1.8
SRR13418739	1	1	1	1	1	29873	29680	29344	29806	29903	29903	29806	2105	1262	1030	2943	1858	2602	4594	0	202	40	0	0	0	0	92.66	95.636	95.516	89.76	93.542	90.934	84.557	B.1.1.306	B.1.1.306	B.1.1.306	B.1.1.306	B.1.1.306	B.1.1.306	B.1.1.306
SRR13418740	1	1	1	1	1	29871	29859	29821	29806	29903	29903	29806	2461	1739	1671	3431	1844	2950	5624	5	33	20	0	0	0	0	93.151	94.124	94.225	88.513	93.964	91.74	83.644	B.1.1.8	B.1.1.8	B.1.1.8	B.1.1.8	B.1.1.8	B.1.1.8	B.1.1.8
SRR13418741	1	1	1	1	1	30028	29875	29606	29806	29903	29903	29806	7989	6248	5816	9265	7592	8908	12879	2	8	237	1	0	1	1	74.638	80.4	80.838	68.956	75.431	71.575	59.252	B.1.1.8	B.1.1.8	B.1.1.8	B.1.1.8	B.1.1.8	B.1.1.8	B.1.1.8
SRR13418742	1	1	1	1	1	29873	29782	29838	29807	29903	29904	29807	6097	4565	4448	7948	4887	7242	10715	0	101	4	0	0	0	0	81.697	85.72	86.128	73.324	86.008	78.514	67.849	B.1.1.306	B.1.1.306	B.1.1.306	B.1.1.306	B.1.1.306	B.1.1.306	B.1.1.306
SRR13418743	1	1	1	1	1	29873	29486	29843	29834	29903	29903	29834	4851	3602	3622	6341	4461	5822	9035	0		24	0	0	0	0	86.633	87.633	88.316	79.413	86.543	83.594	72.411	B.1.1.306	B.1.1.306	B.1.1.306	B.1.1.306	B.1.1.306	B.1.1.306	B.1.1.306
SRR13418744	1	1	1	1	1	29883	29875	29831	29865	29903	29903	29865	95	1	0	229	508	182	661	0	9	9	0	0	0	0	99.903	99.913	99.789	99.743	98.301	99.736	97.79	B.1.1.8	B.1.1.8	B.1.1.8	B.1.1.8	B.1.1.8	B.1.1.8	B.1.1.8
SRR13418745	1	1	1	1	1	29873	29869	29837	29837	29903	29903	29837	1586	1088	1017	2338	1283	1984	3600	0	6	0	0	0	0	0	95.001	96.673	96.9	92.084	97.368	93.148	89.202	B.1.195	B.1.195	B.1.195	B.1.195	B.1.195	B.1.195	B.1.195
SRR13418746	1	1	1	1	1	29882	29878	29831	29851	29903	29903	29851	108	8	7	142	321	200	249	4	10	7	0	0	0	0	99.9	99.9	99.776	99.351	98.927	99.331	99.167	B.1.1.8	B.1.1.8	B.1.1.8	B.1.1.8	B.1.1.8	B.1.1.8	B.1.1.8
SRR13418747	1	1	1	1	1	29836	29860	29860	29854	29903	29903	29854	307	262	175	535	321	456	1296	0	8	3	0	0	0	0	98.927	98.927	99.217	98.284	98.927	98.676	95.713	B.1.1.8	B.1.1.8	B.1.1.8	B.1.1.8	B.1.1.8	B.1.1.8	B.1.1.8
SRR13418748	1	1	1	1	1	30036	29838	29838	29865	29903	29903	29865	518	148	148	547	321	461	1629	0	0	0	0	0	0	0	98.96	99.298	99.298	98.044	98.927	98.672	94.265	B.1.1.8	B.1.1.8	B.1.1.8	B.1.1.8	B.1.1.8	B.1.1.8	B.1.1.8
SRR13418749	1	1	1	1	1	29836	29819	29819	29808	29903	29903	29808	644	546	319	991	592	980	2813	0	18	18	0	0	0	0	97.375	97.729	98.642	96.402	97.733	96.693	90.372	B.1.1.8	B.1.1.8	B.1.1.8	B.1.1.8	B.1.1.8	B.1.1.8	B.1.1.8
SRR13418750	1	1	1	1	1	29836	29839	29839	29806	29903	29903	29806	1241	713	713	1986	847	1563	2163	0	4	1	0	0	0	0	96.201	97.572	97.572	93.034	97.281	95.572	92.954	B.1.1.8	B.1.1.8	B.1.1.8	B.1.1.8	B.1.1.8	B.1.1.8	B.1.1.8
SRR13418751	1	1	1	1	1	29873	29982	29944	29837	29903	29903	29837	692	403	429	1067	589	958	1808	0	24	13	0	0	0	0	97.783	98.512	98.903	96.211	97.733	97.067	93.693	B.1.1.8	B.1.1.8	B.1.1.8	B.1.1.8	B.1.1.8	B.1.1.8	B.1.1.8
SRR13418752	1	1	1	1	1	29836	29824	29824	29835	29903	29903	29835	263	17	17	396	321	384	778	0	20	20	0	0	0	0	98.93	99.776	99.776	98.672	98.927	98.716	97.79	B.1.1.8	B.1.1.8	B.1.1.8	B.1.1.8	B.1.1.8	B.1.1.8	B.1.1.8
SRR13418753	1	1	1	1	1	29885	29886	29580	29849	29903	29903	29849	124	107	2	319	321	288	659	0	0	256	0	0	0	0	99.545	99.545	98.93	98.753	98.927	99.294	97.79	B.1.1.8	B.1.1.8	B.1.1.8	B.1.1.8	B.1.1.8	B.1.1.8	B.1.1.8
SRR13418754	1	1	1	1	1	29885	29853	29671	29836	29903	29903	29836	926	446	336	1277	1021	1227	2876	0	66	171	0	0	0	0	96.773	97.99	98.311	95.512	96.649	95.806	90.242	B.1.1.8	B.1.1.8	B.1.1.8	B.1.1.8	B.1.1.8	B.1.1.8	B.1.1.8
SRR13418755	1	1	1	1	1	29836	29831	29832	29840	29903	29903	29840	22	0	1	46	321	98	249	0	5	5	0	0	0	0	99.776	99.776	99.776	99.676	98.927	99.676	99.167	B.1.1.8	B.1.1.8	B.1.1.8	B.1.1.8	B.1.1.8	B.1.1.8	B.1.1.8
SRR13418756	1	1	1	1	1	30041	29832	29832	29861	29903	29903	29861	203	102	106	179	320	224	518	0	5	5	0	0	0	0	99.562	99.438	99.425	99.261	98.93	99.251	98.592	B.1.1.8	B.1.1.8	B.1.1.8	B.1.1.8	B.1.1.8	B.1.1.8	B.1.1.8
SRR13418757	1	1	1	1	1	29836	29587	29692	29857	29903	29903	29857	490	38	38	623	321	590	837	0	249	144	0	0	0	0	98.937	98.937	99.288	98.017	98.927	98.315	97.204	B.1.1.8	B.1.1.8	B.1.1.8	B.1.1.8	B.1.1.8	B.1.1.8	B.1.1.8
SRR13418758	1	1	1	1	1	29887	30509	30458	29850	29903	29903	29850	270	96	89	508	431	406	1119	3			0	0	0	0	99.05	99.549	99.425	98.124	98.927	99.278	96.943	B.1.1.8	B.1.1.8	B.1.1.8	B.1.1.8	B.1.1.8	B.1.1.8	B.1.1.8
SRR13418759	1	1	1	1	1	29836	29832	29832	29836	29903	29903	29836	101	1	1	158	321	163	249	0	5	5	0	0	0	0	99.776	99.776	99.776	99.248	98.927	99.676	99.167	B.1.1.8	B.1.1.8	B.1.1.8	B.1.1.8	B.1.1.8	B.1.1.8	B.1.1.8
SRR13418760	1	1	1	1	1	29882	29879	29842	29865	29903	29903	29865	119	106	106	35	303	84	1425	0	3	3	0	0	0	0	99.572	99.575	99.452	99.773	98.987	99.736	94.763	B.1.1.8	B.1.1.8	B.1.1.8	B.1.1.8	B.1.1.8	B.1.1.8	B.1.1.8
SRR13418761	1	1	1	1	1	29873	29867	29479	29849	29903	29903	29836	10120	10011	11311	14121	10125	14451	18938	0	6		0	0	0	0	50.51	51.02	59.048	50.12	49.98	50.048	36.408	B.1	B.1	B.1	B.1	B.1	B.1	-
SRR13418762	1	1	1	1	1	29873	29867	29841	29836	29903	29903	29850	547	407	336	875	649	789	2176	0	5	0	0	0	0	0	97.997	98.977	98.853	96.833	97.776	97.321	93.272	B.1.1.306	B.1.1.306	B.1.1.306	B.1.1.306	B.1.1.306	B.1.1.306	B.1.1.306
SRR13418763	1	1	1	1	1	29873	29868	29837	29850	29903	29903	29841	190	106	109	332	452	306	794	0	30	0	0	0	0	0	99.545	99.545	99.421	99.214	98.927	99.291	97.345	B.1.1.306	B.1.1.306	B.1.1.306	B.1.1.306	B.1.1.306	B.1.1.306	B.1.1.306
SRR13418764	1	1	1	1	1	30044	29843	29806	29841	29903	29903	29836	617	398	289	707	462	641	1866	0	269	30	0	0	0	0	98.274	98.422	98.927	97.629	98.301	97.87	93.649	B.1.369	B.1.369	B.1.369	B.1.369	B.1.369	B.1.369	B.1.369
SRR13418765	1	1	1	1	1	29873	29616	29572	29836	29903	29903	29833	1630	887	823	2193	1526	2138	3604	0	6	272	0	0	0	0	94.549	96.716	97.044	92.84	94.743	92.86	88.209	B.1.1.8	B.1.1.8	B.1.1.8	B.1.1.8	B.1.1.8	B.1.1.8	B.1.1.8
SRR13418770	1	1	1	1	1	29836	29830	29830	29833	29903	29903	29862	960	548	548	1194	711	1305	2096	0	0	6	0	0	0	0	96.154	98.529	98.529	95.776	97.458	95.201	92.76	B.1.1.8	B.1.1.8	B.1.1.8	B.1.1.8	B.1.1.8	B.1.1.8	B.1.1.8
SRR13418771	1	1	1	1	1	29836	29837	29837	29862	29903	29903	29834	118	108	108	265	320	206	421	0	16	0	0	0	0	0	99.421	99.421	99.421	98.753	98.93	99.311	98.592	B.1.195	B.1.195	B.1.195	B.1.195	B.1.195	B.1.195	B.1.195
SRR13418782	1	1	1	1	1	29873	29857	29820	29834	29903	29903	29862	693	444	378	1220	747	949	2929	0	24	16	0	0	0	0	97.499	98.318	98.763	96.067	97.368	96.693	89.7	B.1.1.8	B.1.1.8	B.1.1.8	B.1.1.8	B.1.1.8	B.1.1.8	B.1.1.8
SRR13418793	1	1	1	1	1	29870	29861	29810	29862	29903	29903	29832	178	4	3	255	321	200	570	12	6	27	0	0	0	0	99.552	99.9	99.776	99.274	98.927	99.331	98.592	B.1.1.8	B.1.1.8	B.1.1.8	B.1.1.8	B.1.1.8	B.1.1.8	B.1.1.8
SRR13418804	1	1	1	1	1	29836	29832	29909	29832	29903	29903	29861	666	572	377	1346	754	1086	2801	0	5	0	0	0	0	0	98.298	98.298	99.211	95.158	97.479	97.05	90.757	B.1.1.8	B.1.1.8	B.1.1.8	B.1.1.8	B.1.1.8	B.1.1.8	B.1.1.8
SRR13418815	1	1	1	1	1	29853	29849	29849	29861	29903	29903	29867	122	1	1	211	295	193	708	0	12	5	0	0	0	0	99.448	99.796	99.796	99.264	99.013	99.355	97.79	B.1.1.8	B.1.1.8	B.1.1.8	B.1.1.8	B.1.1.8	B.1.1.8	B.1.1.8
SRR13418826	1	1	1	1	1	29836	29825	29825	29867	29903	29903	29859	370	320	288	627	321	551	1950	0	25	12	0	0	0	0	98.927	98.927	98.927	98.124	98.927	98.679	92.961	B.1.1.8	B.1.1.8	B.1.1.8	B.1.1.8	B.1.1.8	B.1.1.8	B.1.1.8
SRR13418837	1	1	1	1	1	29840	29813	29733	29859	29903	29903	29864	48	4	7	110	321	92	249	3	23	105	0	0	0	0	99.779	99.779	99.779	99.773	98.927	99.692	99.167	B.1.1.8	B.1.1.8	B.1.1.8	B.1.1.8	B.1.1.8	B.1.1.8	B.1.1.8
SRR13418848	1	1	1	1	1	29836	29818	29817	29864	29903	29903	29841	925	656	545	1146	968	1222	2619	0	52	19	0	0	0	0	96.649	97.729	98.358	96.054	97.375	95.823	90.784	B.1.1.8	B.1.1.8	B.1.1.8	B.1.1.8	B.1.1.8	B.1.1.8	B.1.1.8
SRR13418859	1	1	1	1	1	29872	29844	29808	29841	29903	29903	29839	701	423	365	1187	628	921	2134	3	5	49	0	0	0	0	98.064	98.686	98.93	95.827	98.572	97.438	92.753	B.1.1.8	B.1.1.8	B.1.1.8	B.1.1.8	B.1.1.8	B.1.1.8	B.1.1.8
SRR13418866	1	1	1	1	1	29872	29874	29837	29839	29903	29903	29856	674	448	405	1085	943	1023	3250	1	36	1	0	0	0	0	97.853	99.05	98.927	96.425	97.014	96.77	89.289	B.1.1.8	B.1.1.8	B.1.1.8	B.1.1.8	B.1.1.8	B.1.1.8	B.1.1.8
SRR13418867	1	1	1	1	1	29876	29878	29836	29856	29903	29903	29835	275	2	1	326	304	364	915	8	236	236	0	0	0	0	99.05	99.482	99.358	98.753	98.927	98.783	97.06	B.1.1.46	B.1.1.46	B.1.1.46	B.1.1.46	B.1.1.46	B.1.1.46	B.1.1.46
SRR13418868	1	1	1	1	1	29873	29638	29600	29835	29903	29903	29850	3795	2546	2478	4621	3182	4507	8162	0	12	12	0	0	0	0	87.67	91.636	91.513	84.503	89.78	84.824	72.197	B.1.1.8	B.1.1.8	B.1.1.8	B.1.1.8	B.1.1.8	B.1.1.8	B.1.1.8
SRR13418869	1	1	1	1	1	29836	29824	29824	29850	29903	29903	29863	174	93	93	281	392	297	756	0	8	5	0	0	0	0	99.776	99.776	99.776	98.883	98.943	99.345	97.783	B.1.1.8	B.1.1.8	B.1.1.8	B.1.1.8	B.1.1.8	B.1.1.8	B.1.1.8
SRR13418870	1	1	1	1	1	29876	29877	29835	29863	29903	29903	29837	124	107	106	414	321	220	615	8	0	0	0	0	0	0	99.545	99.549	99.425	98.729	98.927	99.264	97.79	B.1.1.306	B.1.1.306	B.1.1.306	B.1.1.306	B.1.1.306	B.1.1.306	B.1.1.306
SRR13418871	1	1	1	1	1	29836	29839	29839	29837	29903	29903	29865	265	147	147	381	457	279	1949	0	6	6	0	0	0	0	98.927	99.291	99.291	98.753	98.408	99.117	92.894	B.1.1.29	B.1.1.29	B.1.1.29	B.1.1.29	B.1.1.29	B.1.1.29	B.1.1.29
SRR13418872	1	1	1	1	1	29836	29831	29831	29865	29903	29903	29848	155	107	107	267	321	225	927	0	11	11	0	0	0	0	99.421	99.421	99.421	99.05	98.927	99.248	96.97	B.1.1.306	B.1.1.306	B.1.1.306	B.1.1.306	B.1.1.306	B.1.1.306	B.1.1.306
SRR13418873	1	1	1	1	1	29887	29877	29826	29848	29903	29903	29826	270	112	112	336	321	422	1196	0	245	186	0	0	0	0	99.545	99.9	99.776	99.248	98.927	98.873	95.984	B.1.36	B.1.36	B.1.36	B.1.36	B.1.36	B.1.36	B.1.36
SRR13418874	1	1	1	1	1	29873	29634	29650	29826	29903	29903	29836	1696	917	807	2231	1407	2193	3185	0	9	5	0	0	0	0	93.716	96.776	97.468	92.198	95.171	91.854	89.851	B.1.1.8	B.1.1.8	B.1.1.8	B.1.1.8	B.1.1.8	B.1.1.8	B.1.1.8
SRR13418875	1	1	1	1	1	29836	29833	29833	29836	29903	29903	29807	444	243	246	632	459	569	1295	0	5	6	0	0	0	0	98.927	98.93	98.93	97.666	98.298	98.415	95.649	B.1.1.8	B.1.1.8	B.1.1.8	B.1.1.8	B.1.1.8	B.1.1.8	B.1.1.8
SRR13418876	1	1	1	1	1	29887	29882	29830	29807	29903	29903	29848	1033	652	599	1653	910	1393	3048	0	4	0	0	0	0	0	96.138	98.422	98.475	94.151	97.943	94.997	90.847	B.1.1.8	B.1.1.8	B.1.1.8	B.1.1.8	B.1.1.8	B.1.1.8	B.1.1.8
SRR13418877	1	1	1	1	1	29868	29837	29840	29848	29903	29903	29851	270	231	230	416	321	377	1317	0	0	3	0	0	0	0	99.034	98.93	98.93	98.672	98.927	98.739	95.335	B.1.1.306	B.1.1.306	B.1.1.306	B.1.1.306	B.1.1.306	B.1.1.306	B.1.1.306
SRR13418878	1	1	1	1	1	29872	29873	29834	29851	29903	29903	29836	98	5	1	149	321	179	575	0	25	23	0	0	0	0	99.896	99.896	99.776	99.328	98.927	99.401	97.923	B.1.1.306	B.1.1.306	B.1.1.306	B.1.1.306	B.1.1.306	B.1.1.306	B.1.1.306
SRR13418879	1	1	1	1	1	29873	29858	29821	29836	29903	29903	29836	442	324	230	787	704	633	2035	0			0	0	0	0	98.702	98.709	98.93	97.161	97.572	98.224	92.867	B.1.1.306	B.1.1.306	B.1.1.306	B.1.1.306	B.1.1.306	B.1.1.306	B.1.1.306
SRR13418880	1	1	1	1	1	29891	29382	29328	29836	29903	29903	29806	2228	1203	1064	2584	1322	2650	3949	0	5	5	0	0	0	0	92.633	94.629	95.021	91.365	95.432	91.466	87.77	B.1.1.8	B.1.1.8	B.1.1.8	B.1.1.8	B.1.1.8	B.1.1.8	B.1.1.8
SRR13418881	1	1	1	1	1	29873	29869	29831	29806	29903	29903	29842	1225	985	917	1766	1100	1635	3487	0	21	72	0	0	0	0	95.97	96.552	96.997	93.793	96.626	94.442	88.77	B.1.1.281	B.1.1.281	B.1.1.281	B.1.1.281	B.1.1.281	B.1.1.281	B.1.1.281
SRR13418882	1	1	0	1	1	29827	29827	29788	29842	29903	29903	29834	850	182	152	1119	29903	1013	1859	0	0	0	0	-	0	0	96.823	98.876	98.873	96.041	-	96.522	94.098	B.1.195	B.1.195	B.1.195	B.1.195	None	B.1.195	B.1.195
SRR13418883	1	1	1	1	1	29836	29836	29836	29834	29903	29903	29834	122	106	106	156	321	217	749	0	0		0	0	0	0	99.421	99.421	99.421	99.248	98.927	99.274	97.341	B.1.1.306	B.1.1.306	B.1.1.306	B.1.1.306	B.1.1.306	B.1.1.306	B.1.1.306
Statistics for generating the box plot graph. fig 2. Average size of consensus.
	PIPECOVGapCloserl100	Viralrecon	V-pipe	Signal	CLC
Upper whisker	29872.00	29874.00	29903.00	29903.00	29874.00
3rd quartile	29833.00	29851.00	29903.00	29903.00	29851.00
Median	29827.00	29837.50	29903.00	29903.00	29837.00
1st quartile	29796.00	29835.00	29903.00	29903.00	29835.00
Lower whisker	29788.00	29811.00	29903.00	29903.00	29811.00
Nr. of data points	120.00	120.00	120.00	120.00	120.00
Statistics for generating the box plot graph. fig 3. Average coverage of 120 samples.
	PIPECOVGapCloserl100	Viralrecon	V-pipe	Signal	CLC
Upper whisker	99.80	99.78	99.79	99.76	99.60
3rd quartile	99.42	98.86	98.93	99.29	97.78
Median	98.93	96.67	97.75	97.23	92.95
1st quartile	96.91	92.14	95.41	93.09	88.75
Lower whisker	93.58	82.36	90.83	84.82	75.47
Nr. of data points	120.00	120.00	120.00	120.00	120.00
Statistics for generating the box plot graph. fig 6. Average coverage of 120 samples.
	PipeCoV	V-pipe	Signal	Viralrecon	CLC
Upper whisker	2092.00	2741.00	4533.00	5284.00	7566.00
3rd quartile	917.50	1381.50	2084.50	2321.00	3602.00
Median	324.00	631.00	824.50	998.00	2065.50
1st quartile	106.00	321.00	222.00	293.50	752.50
Lower whisker	0.00	90.00	84.00	35.00	241.00
Nr. of data points	120.00	120.00	120.00	120.00	120.00

## Sheet: SampleDetails
Run	Assay Type	AvgSpotLen	Bases	BioProject	BioSample	BioSampleModel	Bytes	Center Name	collected_by	Collection_Date	Consent	Experiment	geo_loc_name_country	geo_loc_name_country_continent	geo_loc_name	Host_disease	Host	Instrument	lat_lon	LibraryLayout	LibrarySelection	LibrarySource	Organism	ReleaseDate	SRA Study
SRR13418713	WGA	422	72826286	PRJNA691556	SAMN17295740	Pathogen.cl	26985269	CENTRE FOR DNA FINGERPRINTING AND DIAGNOSTICS	Nizams Institute of Medical Sciences	2020-04-12	public	SRX9834743	India	Asia	India:Telangana	COVID-19	Homo sapiens	Illumina MiSeq	18.11 N 79.01 E	PAIRED	PCR	VIRAL RNA	Severe acute respiratory syndrome coronavirus 2	2021-01-12T00:00:00Z	SRP301438
SRR13418697	WGA	378	80011612	PRJNA691556	SAMN17295755	Pathogen.cl	34757348	CENTRE FOR DNA FINGERPRINTING AND DIAGNOSTICS	Nizams Institute of Medical Sciences	2020-05-26	public	SRX9834759	India	Asia	India:Telangana	COVID-19	Homo sapiens	Illumina MiSeq	18.11 N 79.01 E	PAIRED	PCR	VIRAL RNA	Severe acute respiratory syndrome coronavirus 2	2021-01-12T00:00:00Z	SRP301438
SRR13418698	WGA	422	89911589	PRJNA691556	SAMN17295753	Pathogen.cl	35028619	CENTRE FOR DNA FINGERPRINTING AND DIAGNOSTICS	Nizams Institute of Medical Sciences	2020-05-21	public	SRX9834758	India	Asia	India:Telangana	COVID-19	Homo sapiens	Illumina MiSeq	18.11 N 79.01 E	PAIRED	PCR	VIRAL RNA	Severe acute respiratory syndrome coronavirus 2	2021-01-12T00:00:00Z	SRP301438
SRR13418761	WGA	365	91437561	PRJNA691556	SAMN17295758	Pathogen.cl	39738622	CENTRE FOR DNA FINGERPRINTING AND DIAGNOSTICS	Nizams Institute of Medical Sciences	2020-05-27	public	SRX9834695	India	Asia	India:Telangana	COVID-19	Homo sapiens	Illumina MiSeq	18.11 N 79.01 E	PAIRED	PCR	VIRAL RNA	Severe acute respiratory syndrome coronavirus 2	2021-01-12T00:00:00Z	SRP301438
SRR13418883	WGA	420	111551143	PRJNA691556	SAMN17295694	Pathogen.cl	44139745	CENTRE FOR DNA FINGERPRINTING AND DIAGNOSTICS	Centre for DNA Fingerprinting and Diagnostics	2020-05-10	public	SRX9834573	India	Asia	India:Telangana	COVID-19	Homo sapiens	Illumina MiSeq	18.11 N 79.01 E	PAIRED	PCR	VIRAL RNA	Severe acute respiratory syndrome coronavirus 2	2021-01-12T00:00:00Z	SRP301438
SRR13418872	WGA	421	112958469	PRJNA691556	SAMN17295654	Pathogen.cl	40538850	CENTRE FOR DNA FINGERPRINTING AND DIAGNOSTICS	Centre for DNA Fingerprinting and Diagnostics	2020-06-18	public	SRX9834584	India	Asia	India:Telangana	COVID-19	Homo sapiens	Illumina MiSeq	18.11 N 79.01 E	PAIRED	PCR	VIRAL RNA	Severe acute respiratory syndrome coronavirus 2	2021-01-12T00:00:00Z	SRP301438
SRR13418707	WGA	422	114499878	PRJNA691556	SAMN17295772	Pathogen.cl	44722810	CENTRE FOR DNA FINGERPRINTING AND DIAGNOSTICS	Nizams Institute of Medical Sciences	2020-05-31	public	SRX9834749	India	Asia	India:Telangana	COVID-19	Homo sapiens	Illumina MiSeq	18.11 N 79.01 E	PAIRED	PCR	VIRAL RNA	Severe acute respiratory syndrome coronavirus 2	2021-01-12T00:00:00Z	SRP301438
SRR13418878	WGA	420	115021344	PRJNA691556	SAMN17295644	Pathogen.cl	42341698	CENTRE FOR DNA FINGERPRINTING AND DIAGNOSTICS	Centre for DNA Fingerprinting and Diagnostics	2020-06-17	public	SRX9834578	India	Asia	India:Telangana	COVID-19	Homo sapiens	Illumina MiSeq	18.11 N 79.01 E	PAIRED	PCR	VIRAL RNA	Severe acute respiratory syndrome coronavirus 2	2021-01-12T00:00:00Z	SRP301438
SRR13418702	WGA	418	120168506	PRJNA691556	SAMN17295749	Pathogen.cl	45932029	CENTRE FOR DNA FINGERPRINTING AND DIAGNOSTICS	Nizams Institute of Medical Sciences	2020-05-13	public	SRX9834754	India	Asia	India:Telangana	COVID-19	Homo sapiens	Illumina MiSeq	18.11 N 79.01 E	PAIRED	PCR	VIRAL RNA	Severe acute respiratory syndrome coronavirus 2	2021-01-12T00:00:00Z	SRP301438
SRR13418715	WGA	422	120481812	PRJNA691556	SAMN17295790	Pathogen.cl	44161603	CENTRE FOR DNA FINGERPRINTING AND DIAGNOSTICS	Nizams Institute of Medical Sciences	2020-03-31	public	SRX9834741	India	Asia	India:Telangana	COVID-19	Homo sapiens	Illumina MiSeq	18.11 N 79.01 E	PAIRED	PCR	VIRAL RNA	Severe acute respiratory syndrome coronavirus 2	2021-01-12T00:00:00Z	SRP301438
SRR13418875	WGA	419	122401206	PRJNA691556	SAMN17295674	Pathogen.cl	43815483	CENTRE FOR DNA FINGERPRINTING AND DIAGNOSTICS	Centre for DNA Fingerprinting and Diagnostics	2020-06-20	public	SRX9834581	India	Asia	India:Telangana	COVID-19	Homo sapiens	Illumina MiSeq	18.11 N 79.01 E	PAIRED	PCR	VIRAL RNA	Severe acute respiratory syndrome coronavirus 2	2021-01-12T00:00:00Z	SRP301438
SRR13418674	WGA	418	124716512	PRJNA691556	SAMN17295642	Pathogen.cl	45010999	CENTRE FOR DNA FINGERPRINTING AND DIAGNOSTICS	Centre for DNA Fingerprinting and Diagnostics	2020-06-16	public	SRX9834782	India	Asia	India:Telangana	COVID-19	Homo sapiens	Illumina MiSeq	18.11 N 79.01 E	PAIRED	PCR	VIRAL RNA	Severe acute respiratory syndrome coronavirus 2	2021-01-12T00:00:00Z	SRP301438
SRR13418686	WGA	420	124771721	PRJNA691556	SAMN17295629	Pathogen.cl	45119389	CENTRE FOR DNA FINGERPRINTING AND DIAGNOSTICS	Centre for DNA Fingerprinting and Diagnostics	2020-06-10	public	SRX9834770	India	Asia	India:Telangana	COVID-19	Homo sapiens	Illumina MiSeq	18.11 N 79.01 E	PAIRED	PCR	VIRAL RNA	Severe acute respiratory syndrome coronavirus 2	2021-01-12T00:00:00Z	SRP301438
SRR13418866	WGA	415	124900328	PRJNA691556	SAMN17295636	Pathogen.cl	43944038	CENTRE FOR DNA FINGERPRINTING AND DIAGNOSTICS	Centre for DNA Fingerprinting and Diagnostics	2020-06-16	public	SRX9834590	India	Asia	India:Telangana	COVID-19	Homo sapiens	Illumina MiSeq	18.11 N 79.01 E	PAIRED	PCR	VIRAL RNA	Severe acute respiratory syndrome coronavirus 2	2021-01-12T00:00:00Z	SRP301438
SRR13418741	WGA	384	128112283	PRJNA691556	SAMN17295731	Pathogen.cl	72402707	CENTRE FOR DNA FINGERPRINTING AND DIAGNOSTICS	Centre for DNA Fingerprinting and Diagnostics	2020-05-27	public	SRX9834715	India	Asia	India:Telangana	COVID-19	Homo sapiens	Illumina MiSeq	18.11 N 79.01 E	PAIRED	PCR	VIRAL RNA	Severe acute respiratory syndrome coronavirus 2	2021-01-12T00:00:00Z	SRP301438
SRR13418869	WGA	419	130827945	PRJNA691556	SAMN17295625	Pathogen.cl	46477120	CENTRE FOR DNA FINGERPRINTING AND DIAGNOSTICS	Centre for DNA Fingerprinting and Diagnostics	2020-06-10	public	SRX9834587	India	Asia	India:Telangana	COVID-19	Homo sapiens	Illumina MiSeq	18.11 N 79.01 E	PAIRED	PCR	VIRAL RNA	Severe acute respiratory syndrome coronavirus 2	2021-01-12T00:00:00Z	SRP301438
SRR13418675	WGA	420	135136053	PRJNA691556	SAMN17295660	Pathogen.cl	49452240	CENTRE FOR DNA FINGERPRINTING AND DIAGNOSTICS	Centre for DNA Fingerprinting and Diagnostics	2020-06-19	public	SRX9834781	India	Asia	India:Telangana	COVID-19	Homo sapiens	Illumina MiSeq	18.11 N 79.01 E	PAIRED	PCR	VIRAL RNA	Severe acute respiratory syndrome coronavirus 2	2021-01-12T00:00:00Z	SRP301438
SRR13418676	WGA	417	135620408	PRJNA691556	SAMN17295665	Pathogen.cl	51827328	CENTRE FOR DNA FINGERPRINTING AND DIAGNOSTICS	Centre for DNA Fingerprinting and Diagnostics	2020-06-19	public	SRX9834780	India	Asia	India:Telangana	COVID-19	Homo sapiens	Illumina MiSeq	18.11 N 79.01 E	PAIRED	PCR	VIRAL RNA	Severe acute respiratory syndrome coronavirus 2	2021-01-12T00:00:00Z	SRP301438
SRR13418689	WGA	419	136436149	PRJNA691556	SAMN17295651	Pathogen.cl	47927734	CENTRE FOR DNA FINGERPRINTING AND DIAGNOSTICS	Centre for DNA Fingerprinting and Diagnostics	2020-06-18	public	SRX9834767	India	Asia	India:Telangana	COVID-19	Homo sapiens	Illumina MiSeq	18.11 N 79.01 E	PAIRED	PCR	VIRAL RNA	Severe acute respiratory syndrome coronavirus 2	2021-01-12T00:00:00Z	SRP301438
SRR13418877	WGA	420	140826677	PRJNA691556	SAMN17295650	Pathogen.cl	49937009	CENTRE FOR DNA FINGERPRINTING AND DIAGNOSTICS	Centre for DNA Fingerprinting and Diagnostics	2020-06-18	public	SRX9834579	India	Asia	India:Telangana	COVID-19	Homo sapiens	Illumina MiSeq	18.11 N 79.01 E	PAIRED	PCR	VIRAL RNA	Severe acute respiratory syndrome coronavirus 2	2021-01-12T00:00:00Z	SRP301438
SRR13418837	WGA	421	141260613	PRJNA691556	SAMN17295734	Pathogen.cl	62523797	CENTRE FOR DNA FINGERPRINTING AND DIAGNOSTICS	Centre for DNA Fingerprinting and Diagnostics	2020-05-27	public	SRX9834619	India	Asia	India:Telangana	COVID-19	Homo sapiens	Illumina MiSeq	18.11 N 79.01 E	PAIRED	PCR	VIRAL RNA	Severe acute respiratory syndrome coronavirus 2	2021-01-12T00:00:00Z	SRP301438
SRR13418880	WGA	411	141910958	PRJNA691556	SAMN17295652	Pathogen.cl	51583786	CENTRE FOR DNA FINGERPRINTING AND DIAGNOSTICS	Centre for DNA Fingerprinting and Diagnostics	2020-06-18	public	SRX9834576	India	Asia	India:Telangana	COVID-19	Homo sapiens	Illumina MiSeq	18.11 N 79.01 E	PAIRED	PCR	VIRAL RNA	Severe acute respiratory syndrome coronavirus 2	2021-01-12T00:00:00Z	SRP301438
SRR13418763	WGA	421	141962174	PRJNA691556	SAMN17295752	Pathogen.cl	53592547	CENTRE FOR DNA FINGERPRINTING AND DIAGNOSTICS	Nizams Institute of Medical Sciences	2020-05-21	public	SRX9834693	India	Asia	India:Telangana	COVID-19	Homo sapiens	Illumina MiSeq	18.11 N 79.01 E	PAIRED	PCR	VIRAL RNA	Severe acute respiratory syndrome coronavirus 2	2021-01-12T00:00:00Z	SRP301438
SRR13418704	WGA	410	153533557	PRJNA691556	SAMN17295769	Pathogen.cl	60703975	CENTRE FOR DNA FINGERPRINTING AND DIAGNOSTICS	Nizams Institute of Medical Sciences	2020-05-30	public	SRX9834752	India	Asia	India:Telangana	COVID-19	Homo sapiens	Illumina MiSeq	18.11 N 79.01 E	PAIRED	PCR	VIRAL RNA	Severe acute respiratory syndrome coronavirus 2	2021-01-12T00:00:00Z	SRP301438
SRR13418710	WGA	422	155632049	PRJNA691556	SAMN17295742	Pathogen.cl	57398713	CENTRE FOR DNA FINGERPRINTING AND DIAGNOSTICS	Nizams Institute of Medical Sciences	2020-04-14	public	SRX9834746	India	Asia	India:Telangana	COVID-19	Homo sapiens	Illumina MiSeq	18.11 N 79.01 E	PAIRED	PCR	VIRAL RNA	Severe acute respiratory syndrome coronavirus 2	2021-01-12T00:00:00Z	SRP301438
SRR13418771	WGA	421	155723784	PRJNA691556	SAMN17295696	Pathogen.cl	61032779	CENTRE FOR DNA FINGERPRINTING AND DIAGNOSTICS	Centre for DNA Fingerprinting and Diagnostics	2020-05-10	public	SRX9834685	India	Asia	India:Telangana	COVID-19	Homo sapiens	Illumina MiSeq	18.11 N 79.01 E	PAIRED	PCR	VIRAL RNA	Severe acute respiratory syndrome coronavirus 2	2021-01-12T00:00:00Z	SRP301438
SRR13418826	WGA	421	157638033	PRJNA691556	SAMN17295736	Pathogen.cl	61165998	CENTRE FOR DNA FINGERPRINTING AND DIAGNOSTICS	Centre for DNA Fingerprinting and Diagnostics	2020-05-27	public	SRX9834630	India	Asia	India:Telangana	COVID-19	Homo sapiens	Illumina MiSeq	18.11 N 79.01 E	PAIRED	PCR	VIRAL RNA	Severe acute respiratory syndrome coronavirus 2	2021-01-12T00:00:00Z	SRP301438
SRR13418873	WGA	420	159653599	PRJNA691556	SAMN17295623	Pathogen.cl	57045643	CENTRE FOR DNA FINGERPRINTING AND DIAGNOSTICS	Centre for DNA Fingerprinting and Diagnostics	2020-06-10	public	SRX9834583	India	Asia	India:Telangana	COVID-19	Homo sapiens	Illumina MiSeq	18.11 N 79.01 E	PAIRED	PCR	VIRAL RNA	Severe acute respiratory syndrome coronavirus 2	2021-01-12T00:00:00Z	SRP301438
SRR13418706	WGA	371	160963724	PRJNA691556	SAMN17295724	Pathogen.cl	69110921	CENTRE FOR DNA FINGERPRINTING AND DIAGNOSTICS	Centre for DNA Fingerprinting and Diagnostics	2020-05-12	public	SRX9834750	India	Asia	India:Telangana	COVID-19	Homo sapiens	Illumina MiSeq	18.11 N 79.01 E	PAIRED	PCR	VIRAL RNA	Severe acute respiratory syndrome coronavirus 2	2021-01-12T00:00:00Z	SRP301438
SRR13418712	WGA	413	162304687	PRJNA691556	SAMN17295785	Pathogen.cl	61622498	CENTRE FOR DNA FINGERPRINTING AND DIAGNOSTICS	Nizams Institute of Medical Sciences	2020-06-01	public	SRX9834744	India	Asia	India:Telangana	COVID-19	Homo sapiens	Illumina MiSeq	18.11 N 79.01 E	PAIRED	PCR	VIRAL RNA	Severe acute respiratory syndrome coronavirus 2	2021-01-12T00:00:00Z	SRP301438
SRR13418859	WGA	420	166921483	PRJNA691556	SAMN17295732	Pathogen.cl	65494667	CENTRE FOR DNA FINGERPRINTING AND DIAGNOSTICS	Centre for DNA Fingerprinting and Diagnostics	2020-05-27	public	SRX9834597	India	Asia	India:Telangana	COVID-19	Homo sapiens	Illumina MiSeq	18.11 N 79.01 E	PAIRED	PCR	VIRAL RNA	Severe acute respiratory syndrome coronavirus 2	2021-01-12T00:00:00Z	SRP301438
SRR13418703	WGA	412	171621067	PRJNA691556	SAMN17295747	Pathogen.cl	65302917	CENTRE FOR DNA FINGERPRINTING AND DIAGNOSTICS	Nizams Institute of Medical Sciences	2020-05-08	public	SRX9834753	India	Asia	India:Telangana	COVID-19	Homo sapiens	Illumina MiSeq	18.11 N 79.01 E	PAIRED	PCR	VIRAL RNA	Severe acute respiratory syndrome coronavirus 2	2021-01-12T00:00:00Z	SRP301438
SRR13418882	WGA	219	175920541	PRJNA691556	SAMN17295695	Pathogen.cl	96911210	CENTRE FOR DNA FINGERPRINTING AND DIAGNOSTICS	Centre for DNA Fingerprinting and Diagnostics	2020-05-10	public	SRX9834574	India	Asia	India:Telangana	COVID-19	Homo sapiens	Illumina MiSeq	18.11 N 79.01 E	PAIRED	PCR	VIRAL RNA	Severe acute respiratory syndrome coronavirus 2	2021-01-12T00:00:00Z	SRP301438
SRR13418688	WGA	415	176040591	PRJNA691556	SAMN17295628	Pathogen.cl	62886583	CENTRE FOR DNA FINGERPRINTING AND DIAGNOSTICS	Centre for DNA Fingerprinting and Diagnostics	2020-06-10	public	SRX9834768	India	Asia	India:Telangana	COVID-19	Homo sapiens	Illumina MiSeq	18.11 N 79.01 E	PAIRED	PCR	VIRAL RNA	Severe acute respiratory syndrome coronavirus 2	2021-01-12T00:00:00Z	SRP301438
SRR13418764	WGA	421	177818740	PRJNA691556	SAMN17295748	Pathogen.cl	66429587	CENTRE FOR DNA FINGERPRINTING AND DIAGNOSTICS	Nizams Institute of Medical Sciences	2020-05-11	public	SRX9834692	India	Asia	India:Telangana	COVID-19	Homo sapiens	Illumina MiSeq	18.11 N 79.01 E	PAIRED	PCR	VIRAL RNA	Severe acute respiratory syndrome coronavirus 2	2021-01-12T00:00:00Z	SRP301438
SRR13418879	WGA	419	178979154	PRJNA691556	SAMN17295647	Pathogen.cl	63262722	CENTRE FOR DNA FINGERPRINTING AND DIAGNOSTICS	Centre for DNA Fingerprinting and Diagnostics	2020-06-17	public	SRX9834577	India	Asia	India:Telangana	COVID-19	Homo sapiens	Illumina MiSeq	18.11 N 79.01 E	PAIRED	PCR	VIRAL RNA	Severe acute respiratory syndrome coronavirus 2	2021-01-12T00:00:00Z	SRP301438
SRR13418739	WGA	417	179372512	PRJNA691556	SAMN17295718	Pathogen.cl	78150006	CENTRE FOR DNA FINGERPRINTING AND DIAGNOSTICS	Centre for DNA Fingerprinting and Diagnostics	2020-05-12	public	SRX9834717	India	Asia	India:Telangana	COVID-19	Homo sapiens	Illumina MiSeq	18.11 N 79.01 E	PAIRED	PCR	VIRAL RNA	Severe acute respiratory syndrome coronavirus 2	2021-01-12T00:00:00Z	SRP301438
SRR13418874	WGA	412	184864825	PRJNA691556	SAMN17295655	Pathogen.cl	64951232	CENTRE FOR DNA FINGERPRINTING AND DIAGNOSTICS	Centre for DNA Fingerprinting and Diagnostics	2020-06-18	public	SRX9834582	India	Asia	India:Telangana	COVID-19	Homo sapiens	Illumina MiSeq	18.11 N 79.01 E	PAIRED	PCR	VIRAL RNA	Severe acute respiratory syndrome coronavirus 2	2021-01-12T00:00:00Z	SRP301438
SRR13418691	WGA	419	185092502	PRJNA691556	SAMN17295771	Pathogen.cl	69569899	CENTRE FOR DNA FINGERPRINTING AND DIAGNOSTICS	Nizams Institute of Medical Sciences	2020-05-30	public	SRX9834765	India	Asia	India:Telangana	COVID-19	Homo sapiens	Illumina MiSeq	18.11 N 79.01 E	PAIRED	PCR	VIRAL RNA	Severe acute respiratory syndrome coronavirus 2	2021-01-12T00:00:00Z	SRP301438
SRR13418677	WGA	411	188941695	PRJNA691556	SAMN17295661	Pathogen.cl	67980412	CENTRE FOR DNA FINGERPRINTING AND DIAGNOSTICS	Centre for DNA Fingerprinting and Diagnostics	2020-06-19	public	SRX9834779	India	Asia	India:Telangana	COVID-19	Homo sapiens	Illumina MiSeq	18.11 N 79.01 E	PAIRED	PCR	VIRAL RNA	Severe acute respiratory syndrome coronavirus 2	2021-01-12T00:00:00Z	SRP301438
SRR13418699	WGA	422	189470367	PRJNA691556	SAMN17295770	Pathogen.cl	69804944	CENTRE FOR DNA FINGERPRINTING AND DIAGNOSTICS	Nizams Institute of Medical Sciences	2020-05-30	public	SRX9834757	India	Asia	India:Telangana	COVID-19	Homo sapiens	Illumina MiSeq	18.11 N 79.01 E	PAIRED	PCR	VIRAL RNA	Severe acute respiratory syndrome coronavirus 2	2021-01-12T00:00:00Z	SRP301438
SRR13418684	WGA	419	189602616	PRJNA691556	SAMN17295726	Pathogen.cl	72504850	CENTRE FOR DNA FINGERPRINTING AND DIAGNOSTICS	Centre for DNA Fingerprinting and Diagnostics	2020-05-13	public	SRX9834772	India	Asia	India:Telangana	COVID-19	Homo sapiens	Illumina MiSeq	18.11 N 79.01 E	PAIRED	PCR	VIRAL RNA	Severe acute respiratory syndrome coronavirus 2	2021-01-12T00:00:00Z	SRP301438
SRR13418749	WGA	422	192425991	PRJNA691556	SAMN17295602	Pathogen.cl	74928016	CENTRE FOR DNA FINGERPRINTING AND DIAGNOSTICS	Centre for DNA Fingerprinting and Diagnostics	2020-05-30	public	SRX9834707	India	Asia	India:Telangana	COVID-19	Homo sapiens	Illumina MiSeq	18.11 N 79.01 E	PAIRED	PCR	VIRAL RNA	Severe acute respiratory syndrome coronavirus 2	2021-01-12T00:00:00Z	SRP301438
SRR13418680	WGA	419	193288945	PRJNA691556	SAMN17295675	Pathogen.cl	68719319	CENTRE FOR DNA FINGERPRINTING AND DIAGNOSTICS	Centre for DNA Fingerprinting and Diagnostics	2020-06-20	public	SRX9834776	India	Asia	India:Telangana	COVID-19	Homo sapiens	Illumina MiSeq	18.11 N 79.01 E	PAIRED	PCR	VIRAL RNA	Severe acute respiratory syndrome coronavirus 2	2021-01-12T00:00:00Z	SRP301438
SRR13418695	WGA	417	193561837	PRJNA691556	SAMN17295725	Pathogen.cl	75115555	CENTRE FOR DNA FINGERPRINTING AND DIAGNOSTICS	Centre for DNA Fingerprinting and Diagnostics	2020-05-13	public	SRX9834761	India	Asia	India:Telangana	COVID-19	Homo sapiens	Illumina MiSeq	18.11 N 79.01 E	PAIRED	PCR	VIRAL RNA	Severe acute respiratory syndrome coronavirus 2	2021-01-12T00:00:00Z	SRP301438
SRR13418679	WGA	413	195160307	PRJNA691556	SAMN17295626	Pathogen.cl	70993051	CENTRE FOR DNA FINGERPRINTING AND DIAGNOSTICS	Centre for DNA Fingerprinting and Diagnostics	2020-06-10	public	SRX9834777	India	Asia	India:Telangana	COVID-19	Homo sapiens	Illumina MiSeq	18.11 N 79.01 E	PAIRED	PCR	VIRAL RNA	Severe acute respiratory syndrome coronavirus 2	2021-01-12T00:00:00Z	SRP301438
SRR13418815	WGA	421	195518780	PRJNA691556	SAMN17295737	Pathogen.cl	75247048	CENTRE FOR DNA FINGERPRINTING AND DIAGNOSTICS	Centre for DNA Fingerprinting and Diagnostics	2020-05-27	public	SRX9834641	India	Asia	India:Telangana	COVID-19	Homo sapiens	Illumina MiSeq	18.11 N 79.01 E	PAIRED	PCR	VIRAL RNA	Severe acute respiratory syndrome coronavirus 2	2021-01-12T00:00:00Z	SRP301438
SRR13418692	WGA	423	195610409	PRJNA691556	SAMN17295760	Pathogen.cl	71925648	CENTRE FOR DNA FINGERPRINTING AND DIAGNOSTICS	Nizams Institute of Medical Sciences	2020-05-28	public	SRX9834764	India	Asia	India:Telangana	COVID-19	Homo sapiens	Illumina MiSeq	18.11 N 79.01 E	PAIRED	PCR	VIRAL RNA	Severe acute respiratory syndrome coronavirus 2	2021-01-12T00:00:00Z	SRP301438
SRR13418696	WGA	422	195714575	PRJNA691556	SAMN17295756	Pathogen.cl	73286429	CENTRE FOR DNA FINGERPRINTING AND DIAGNOSTICS	Nizams Institute of Medical Sciences	2020-05-27	public	SRX9834760	India	Asia	India:Telangana	COVID-19	Homo sapiens	Illumina MiSeq	18.11 N 79.01 E	PAIRED	PCR	VIRAL RNA	Severe acute respiratory syndrome coronavirus 2	2021-01-12T00:00:00Z	SRP301438
SRR13418752	WGA	422	196478393	PRJNA691556	SAMN17295600	Pathogen.cl	76796062	CENTRE FOR DNA FINGERPRINTING AND DIAGNOSTICS	Centre for DNA Fingerprinting and Diagnostics	2020-05-30	public	SRX9834704	India	Asia	India:Telangana	COVID-19	Homo sapiens	Illumina MiSeq	18.11 N 79.01 E	PAIRED	PCR	VIRAL RNA	Severe acute respiratory syndrome coronavirus 2	2021-01-12T00:00:00Z	SRP301438
SRR13418714	WGA	422	196548737	PRJNA691556	SAMN17295739	Pathogen.cl	72124960	CENTRE FOR DNA FINGERPRINTING AND DIAGNOSTICS	Nizams Institute of Medical Sciences	2020-04-10	public	SRX9834742	India	Asia	India:Telangana	COVID-19	Homo sapiens	Illumina MiSeq	18.11 N 79.01 E	PAIRED	PCR	VIRAL RNA	Severe acute respiratory syndrome coronavirus 2	2021-01-12T00:00:00Z	SRP301438
SRR13418871	WGA	419	197087743	PRJNA691556	SAMN17295641	Pathogen.cl	69015664	CENTRE FOR DNA FINGERPRINTING AND DIAGNOSTICS	Centre for DNA Fingerprinting and Diagnostics	2020-06-16	public	SRX9834585	India	Asia	India:Telangana	COVID-19	Homo sapiens	Illumina MiSeq	18.11 N 79.01 E	PAIRED	PCR	VIRAL RNA	Severe acute respiratory syndrome coronavirus 2	2021-01-12T00:00:00Z	SRP301438
SRR13418678	WGA	419	197261137	PRJNA691556	SAMN17295678	Pathogen.cl	70296540	CENTRE FOR DNA FINGERPRINTING AND DIAGNOSTICS	Centre for DNA Fingerprinting and Diagnostics	2020-06-20	public	SRX9834778	India	Asia	India:Telangana	COVID-19	Homo sapiens	Illumina MiSeq	18.11 N 79.01 E	PAIRED	PCR	VIRAL RNA	Severe acute respiratory syndrome coronavirus 2	2021-01-12T00:00:00Z	SRP301438
SRR13418701	WGA	415	197403740	PRJNA691556	SAMN17295750	Pathogen.cl	75298496	CENTRE FOR DNA FINGERPRINTING AND DIAGNOSTICS	Nizams Institute of Medical Sciences	2020-05-13	public	SRX9834755	India	Asia	India:Telangana	COVID-19	Homo sapiens	Illumina MiSeq	18.11 N 79.01 E	PAIRED	PCR	VIRAL RNA	Severe acute respiratory syndrome coronavirus 2	2021-01-12T00:00:00Z	SRP301438
SRR13418748	WGA	423	198073917	PRJNA691556	SAMN17295603	Pathogen.cl	76305010	CENTRE FOR DNA FINGERPRINTING AND DIAGNOSTICS	Centre for DNA Fingerprinting and Diagnostics	2020-05-30	public	SRX9834708	India	Asia	India:Telangana	COVID-19	Homo sapiens	Illumina MiSeq	18.11 N 79.01 E	PAIRED	PCR	VIRAL RNA	Severe acute respiratory syndrome coronavirus 2	2021-01-12T00:00:00Z	SRP301438
SRR13418743	WGA	418	199350925	PRJNA691556	SAMN17295727	Pathogen.cl	103420752	CENTRE FOR DNA FINGERPRINTING AND DIAGNOSTICS	Centre for DNA Fingerprinting and Diagnostics	2020-05-16	public	SRX9834713	India	Asia	India:Telangana	COVID-19	Homo sapiens	Illumina MiSeq	18.11 N 79.01 E	PAIRED	PCR	VIRAL RNA	Severe acute respiratory syndrome coronavirus 2	2021-01-12T00:00:00Z	SRP301438
SRR13418765	WGA	420	200840946	PRJNA691556	SAMN17295746	Pathogen.cl	75237942	CENTRE FOR DNA FINGERPRINTING AND DIAGNOSTICS	Nizams Institute of Medical Sciences	2020-06-05	public	SRX9834691	India	Asia	India:Telangana	COVID-19	Homo sapiens	Illumina MiSeq	18.11 N 79.01 E	PAIRED	PCR	VIRAL RNA	Severe acute respiratory syndrome coronavirus 2	2021-01-12T00:00:00Z	SRP301438
SRR13418876	WGA	417	203282534	PRJNA691556	SAMN17295662	Pathogen.cl	72129148	CENTRE FOR DNA FINGERPRINTING AND DIAGNOSTICS	Centre for DNA Fingerprinting and Diagnostics	2020-06-19	public	SRX9834580	India	Asia	India:Telangana	COVID-19	Homo sapiens	Illumina MiSeq	18.11 N 79.01 E	PAIRED	PCR	VIRAL RNA	Severe acute respiratory syndrome coronavirus 2	2021-01-12T00:00:00Z	SRP301438
SRR13418753	WGA	421	207548794	PRJNA691556	SAMN17295599	Pathogen.cl	81686798	CENTRE FOR DNA FINGERPRINTING AND DIAGNOSTICS	Centre for DNA Fingerprinting and Diagnostics	2020-05-30	public	SRX9834703	India	Asia	India:Telangana	COVID-19	Homo sapiens	Illumina MiSeq	18.11 N 79.01 E	PAIRED	PCR	VIRAL RNA	Severe acute respiratory syndrome coronavirus 2	2021-01-12T00:00:00Z	SRP301438
SRR13418708	WGA	423	208007490	PRJNA691556	SAMN17295744	Pathogen.cl	78734656	CENTRE FOR DNA FINGERPRINTING AND DIAGNOSTICS	Nizams Institute of Medical Sciences	2020-04-14	public	SRX9834748	India	Asia	India:Telangana	COVID-19	Homo sapiens	Illumina MiSeq	18.11 N 79.01 E	PAIRED	PCR	VIRAL RNA	Severe acute respiratory syndrome coronavirus 2	2021-01-12T00:00:00Z	SRP301438
SRR13418747	WGA	422	208521003	PRJNA691556	SAMN17295604	Pathogen.cl	79471344	CENTRE FOR DNA FINGERPRINTING AND DIAGNOSTICS	Centre for DNA Fingerprinting and Diagnostics	2020-05-30	public	SRX9834709	India	Asia	India:Telangana	COVID-19	Homo sapiens	Illumina MiSeq	18.11 N 79.01 E	PAIRED	PCR	VIRAL RNA	Severe acute respiratory syndrome coronavirus 2	2021-01-12T00:00:00Z	SRP301438
SRR13418687	WGA	360	209902469	PRJNA691556	SAMN17295649	Pathogen.cl	90375443	CENTRE FOR DNA FINGERPRINTING AND DIAGNOSTICS	Centre for DNA Fingerprinting and Diagnostics	2020-06-17	public	SRX9834769	India	Asia	India:Telangana	COVID-19	Homo sapiens	Illumina MiSeq	18.11 N 79.01 E	PAIRED	PCR	VIRAL RNA	Severe acute respiratory syndrome coronavirus 2	2021-01-12T00:00:00Z	SRP301438
SRR13418693	WGA	423	209990199	PRJNA691556	SAMN17295757	Pathogen.cl	77351481	CENTRE FOR DNA FINGERPRINTING AND DIAGNOSTICS	Nizams Institute of Medical Sciences	2020-05-27	public	SRX9834763	India	Asia	India:Telangana	COVID-19	Homo sapiens	Illumina MiSeq	18.11 N 79.01 E	PAIRED	PCR	VIRAL RNA	Severe acute respiratory syndrome coronavirus 2	2021-01-12T00:00:00Z	SRP301438
SRR13418705	WGA	419	210958812	PRJNA691556	SAMN17295745	Pathogen.cl	78622713	CENTRE FOR DNA FINGERPRINTING AND DIAGNOSTICS	Nizams Institute of Medical Sciences	2020-04-29	public	SRX9834751	India	Asia	India:Telangana	COVID-19	Homo sapiens	Illumina MiSeq	18.11 N 79.01 E	PAIRED	PCR	VIRAL RNA	Severe acute respiratory syndrome coronavirus 2	2021-01-12T00:00:00Z	SRP301438
SRR13418758	WGA	422	211198412	PRJNA691556	SAMN17295593	Pathogen.cl	80996762	CENTRE FOR DNA FINGERPRINTING AND DIAGNOSTICS	Centre for DNA Fingerprinting and Diagnostics	2020-05-30	public	SRX9834698	India	Asia	India:Telangana	COVID-19	Homo sapiens	Illumina MiSeq	18.11 N 79.01 E	PAIRED	PCR	VIRAL RNA	Severe acute respiratory syndrome coronavirus 2	2021-01-12T00:00:00Z	SRP301438
SRR13418868	WGA	395	212239854	PRJNA691556	SAMN17295669	Pathogen.cl	78646487	CENTRE FOR DNA FINGERPRINTING AND DIAGNOSTICS	Centre for DNA Fingerprinting and Diagnostics	2020-06-19	public	SRX9834588	India	Asia	India:Telangana	COVID-19	Homo sapiens	Illumina MiSeq	18.11 N 79.01 E	PAIRED	PCR	VIRAL RNA	Severe acute respiratory syndrome coronavirus 2	2021-01-12T00:00:00Z	SRP301438
SRR13418730	WGA	492	213571435	PRJNA691556	SAMN17295610	Pathogen.cl	93184456	CENTRE FOR DNA FINGERPRINTING AND DIAGNOSTICS	Centre for DNA Fingerprinting and Diagnostics	2020-05-30	public	SRX9834726	India	Asia	India:Telangana	COVID-19	Homo sapiens	Illumina MiSeq	18.11 N 79.01 E	PAIRED	PCR	VIRAL RNA	Severe acute respiratory syndrome coronavirus 2	2021-01-12T00:00:00Z	SRP301438
SRR13418881	WGA	419	214280140	PRJNA691556	SAMN17295728	Pathogen.cl	82013407	CENTRE FOR DNA FINGERPRINTING AND DIAGNOSTICS	Centre for DNA Fingerprinting and Diagnostics	2020-05-22	public	SRX9834575	India	Asia	India:Telangana	COVID-19	Homo sapiens	Illumina MiSeq	18.11 N 79.01 E	PAIRED	PCR	VIRAL RNA	Severe acute respiratory syndrome coronavirus 2	2021-01-12T00:00:00Z	SRP301438
SRR13418745	WGA	490	215984324	PRJNA691556	SAMN17295697	Pathogen.cl	95448236	CENTRE FOR DNA FINGERPRINTING AND DIAGNOSTICS	Centre for DNA Fingerprinting and Diagnostics	2020-05-10	public	SRX9834711	India	Asia	India:Telangana	COVID-19	Homo sapiens	Illumina MiSeq	18.11 N 79.01 E	PAIRED	PCR	VIRAL RNA	Severe acute respiratory syndrome coronavirus 2	2021-01-12T00:00:00Z	SRP301438
SRR13418870	WGA	422	216507226	PRJNA691556	SAMN17295730	Pathogen.cl	91015093	CENTRE FOR DNA FINGERPRINTING AND DIAGNOSTICS	Centre for DNA Fingerprinting and Diagnostics	2020-05-26	public	SRX9834586	India	Asia	India:Telangana	COVID-19	Homo sapiens	Illumina MiSeq	18.11 N 79.01 E	PAIRED	PCR	VIRAL RNA	Severe acute respiratory syndrome coronavirus 2	2021-01-12T00:00:00Z	SRP301438
SRR13418719	WGA	491	218193180	PRJNA691556	SAMN17295620	Pathogen.cl	96969201	CENTRE FOR DNA FINGERPRINTING AND DIAGNOSTICS	Centre for DNA Fingerprinting and Diagnostics	2020-06-08	public	SRX9834737	India	Asia	India:Telangana	COVID-19	Homo sapiens	Illumina MiSeq	18.11 N 79.01 E	PAIRED	PCR	VIRAL RNA	Severe acute respiratory syndrome coronavirus 2	2021-01-12T00:00:00Z	SRP301438
SRR13418755	WGA	423	218378016	PRJNA691556	SAMN17295596	Pathogen.cl	83618510	CENTRE FOR DNA FINGERPRINTING AND DIAGNOSTICS	Centre for DNA Fingerprinting and Diagnostics	2020-05-30	public	SRX9834701	India	Asia	India:Telangana	COVID-19	Homo sapiens	Illumina MiSeq	18.11 N 79.01 E	PAIRED	PCR	VIRAL RNA	Severe acute respiratory syndrome coronavirus 2	2021-01-12T00:00:00Z	SRP301438
SRR13418742	WGA	438	220363781	PRJNA691556	SAMN17295729	Pathogen.cl	110045050	CENTRE FOR DNA FINGERPRINTING AND DIAGNOSTICS	Centre for DNA Fingerprinting and Diagnostics	2020-05-26	public	SRX9834714	India	Asia	India:Telangana	COVID-19	Homo sapiens	Illumina MiSeq	18.11 N 79.01 E	PAIRED	PCR	VIRAL RNA	Severe acute respiratory syndrome coronavirus 2	2021-01-12T00:00:00Z	SRP301438
SRR13418746	WGA	421	222961332	PRJNA691556	SAMN17295605	Pathogen.cl	86306338	CENTRE FOR DNA FINGERPRINTING AND DIAGNOSTICS	Centre for DNA Fingerprinting and Diagnostics	2020-05-30	public	SRX9834710	India	Asia	India:Telangana	COVID-19	Homo sapiens	Illumina MiSeq	18.11 N 79.01 E	PAIRED	PCR	VIRAL RNA	Severe acute respiratory syndrome coronavirus 2	2021-01-12T00:00:00Z	SRP301438
SRR13418700	WGA	422	223484574	PRJNA691556	SAMN17295751	Pathogen.cl	83438037	CENTRE FOR DNA FINGERPRINTING AND DIAGNOSTICS	Nizams Institute of Medical Sciences	2020-05-14	public	SRX9834756	India	Asia	India:Telangana	COVID-19	Homo sapiens	Illumina MiSeq	18.11 N 79.01 E	PAIRED	PCR	VIRAL RNA	Severe acute respiratory syndrome coronavirus 2	2021-01-12T00:00:00Z	SRP301438
SRR13418694	WGA	423	223603236	PRJNA691556	SAMN17295761	Pathogen.cl	82454721	CENTRE FOR DNA FINGERPRINTING AND DIAGNOSTICS	Nizams Institute of Medical Sciences	2020-05-28	public	SRX9834762	India	Asia	India:Telangana	COVID-19	Homo sapiens	Illumina MiSeq	18.11 N 79.01 E	PAIRED	PCR	VIRAL RNA	Severe acute respiratory syndrome coronavirus 2	2021-01-12T00:00:00Z	SRP301438
SRR13418793	WGA	422	224908567	PRJNA691556	SAMN17295584	Pathogen.cl	85719722	CENTRE FOR DNA FINGERPRINTING AND DIAGNOSTICS	Centre for DNA Fingerprinting and Diagnostics	2020-05-28	public	SRX9834663	India	Asia	India:Telangana	COVID-19	Homo sapiens	Illumina MiSeq	18.11 N 79.01 E	PAIRED	PCR	VIRAL RNA	Severe acute respiratory syndrome coronavirus 2	2021-01-12T00:00:00Z	SRP301438
SRR13418731	WGA	492	225364052	PRJNA691556	SAMN17295609	Pathogen.cl	99824160	CENTRE FOR DNA FINGERPRINTING AND DIAGNOSTICS	Centre for DNA Fingerprinting and Diagnostics	2020-05-30	public	SRX9834725	India	Asia	India:Telangana	COVID-19	Homo sapiens	Illumina MiSeq	18.11 N 79.01 E	PAIRED	PCR	VIRAL RNA	Severe acute respiratory syndrome coronavirus 2	2021-01-12T00:00:00Z	SRP301438
SRR13418867	WGA	420	226284304	PRJNA691556	SAMN17295624	Pathogen.cl	79039490	CENTRE FOR DNA FINGERPRINTING AND DIAGNOSTICS	Centre for DNA Fingerprinting and Diagnostics	2020-06-10	public	SRX9834589	India	Asia	India:Telangana	COVID-19	Homo sapiens	Illumina MiSeq	18.11 N 79.01 E	PAIRED	PCR	VIRAL RNA	Severe acute respiratory syndrome coronavirus 2	2021-01-12T00:00:00Z	SRP301438
SRR13418804	WGA	421	228598101	PRJNA691556	SAMN17295738	Pathogen.cl	87720337	CENTRE FOR DNA FINGERPRINTING AND DIAGNOSTICS	Centre for DNA Fingerprinting and Diagnostics	2020-05-27	public	SRX9834652	India	Asia	India:Telangana	COVID-19	Homo sapiens	Illumina MiSeq	18.11 N 79.01 E	PAIRED	PCR	VIRAL RNA	Severe acute respiratory syndrome coronavirus 2	2021-01-12T00:00:00Z	SRP301438
SRR13418740	WGA	466	228674006	PRJNA691556	SAMN17295587	Pathogen.cl	104773632	CENTRE FOR DNA FINGERPRINTING AND DIAGNOSTICS	Centre for DNA Fingerprinting and Diagnostics	2020-05-28	public	SRX9834716	India	Asia	India:Telangana	COVID-19	Homo sapiens	Illumina MiSeq	18.11 N 79.01 E	PAIRED	PCR	VIRAL RNA	Severe acute respiratory syndrome coronavirus 2	2021-01-12T00:00:00Z	SRP301438
SRR13418750	WGA	500	236685953	PRJNA691556	SAMN17295717	Pathogen.cl	119903654	CENTRE FOR DNA FINGERPRINTING AND DIAGNOSTICS	Centre for DNA Fingerprinting and Diagnostics	2020-05-12	public	SRX9834706	India	Asia	India:Telangana	COVID-19	Homo sapiens	Illumina MiSeq	18.11 N 79.01 E	PAIRED	PCR	VIRAL RNA	Severe acute respiratory syndrome coronavirus 2	2021-01-12T00:00:00Z	SRP301438
SRR13418762	WGA	420	246977300	PRJNA691556	SAMN17295754	Pathogen.cl	91745132	CENTRE FOR DNA FINGERPRINTING AND DIAGNOSTICS	Nizams Institute of Medical Sciences	2020-05-25	public	SRX9834694	India	Asia	India:Telangana	COVID-19	Homo sapiens	Illumina MiSeq	18.11 N 79.01 E	PAIRED	PCR	VIRAL RNA	Severe acute respiratory syndrome coronavirus 2	2021-01-12T00:00:00Z	SRP301438
SRR13418682	WGA	421	250190949	PRJNA691556	SAMN17295653	Pathogen.cl	89057581	CENTRE FOR DNA FINGERPRINTING AND DIAGNOSTICS	Centre for DNA Fingerprinting and Diagnostics	2020-06-18	public	SRX9834774	India	Asia	India:Telangana	COVID-19	Homo sapiens	Illumina MiSeq	18.11 N 79.01 E	PAIRED	PCR	VIRAL RNA	Severe acute respiratory syndrome coronavirus 2	2021-01-12T00:00:00Z	SRP301438
SRR13418759	WGA	423	253336610	PRJNA691556	SAMN17295592	Pathogen.cl	108684094	CENTRE FOR DNA FINGERPRINTING AND DIAGNOSTICS	Centre for DNA Fingerprinting and Diagnostics	2020-05-30	public	SRX9834697	India	Asia	India:Telangana	COVID-19	Homo sapiens	Illumina MiSeq	18.11 N 79.01 E	PAIRED	PCR	VIRAL RNA	Severe acute respiratory syndrome coronavirus 2	2021-01-12T00:00:00Z	SRP301438
SRR13418718	WGA	492	254200876	PRJNA691556	SAMN17295621	Pathogen.cl	110252148	CENTRE FOR DNA FINGERPRINTING AND DIAGNOSTICS	Centre for DNA Fingerprinting and Diagnostics	2020-06-08	public	SRX9834738	India	Asia	India:Telangana	COVID-19	Homo sapiens	Illumina MiSeq	18.11 N 79.01 E	PAIRED	PCR	VIRAL RNA	Severe acute respiratory syndrome coronavirus 2	2021-01-12T00:00:00Z	SRP301438
SRR13418717	WGA	483	254761519	PRJNA691556	SAMN17295721	Pathogen.cl	122388954	CENTRE FOR DNA FINGERPRINTING AND DIAGNOSTICS	Centre for DNA Fingerprinting and Diagnostics	2020-05-12	public	SRX9834739	India	Asia	India:Telangana	COVID-19	Homo sapiens	Illumina MiSeq	18.11 N 79.01 E	PAIRED	PCR	VIRAL RNA	Severe acute respiratory syndrome coronavirus 2	2021-01-12T00:00:00Z	SRP301438
SRR13418690	WGA	421	254952818	PRJNA691556	SAMN17295759	Pathogen.cl	94130629	CENTRE FOR DNA FINGERPRINTING AND DIAGNOSTICS	Nizams Institute of Medical Sciences	2020-05-28	public	SRX9834766	India	Asia	India:Telangana	COVID-19	Homo sapiens	Illumina MiSeq	18.11 N 79.01 E	PAIRED	PCR	VIRAL RNA	Severe acute respiratory syndrome coronavirus 2	2021-01-12T00:00:00Z	SRP301438
SRR13418685	WGA	418	257856490	PRJNA691556	SAMN17295676	Pathogen.cl	91346088	CENTRE FOR DNA FINGERPRINTING AND DIAGNOSTICS	Centre for DNA Fingerprinting and Diagnostics	2020-06-20	public	SRX9834771	India	Asia	India:Telangana	COVID-19	Homo sapiens	Illumina MiSeq	18.11 N 79.01 E	PAIRED	PCR	VIRAL RNA	Severe acute respiratory syndrome coronavirus 2	2021-01-12T00:00:00Z	SRP301438
SRR13418751	WGA	422	258030393	PRJNA691556	SAMN17295601	Pathogen.cl	112133699	CENTRE FOR DNA FINGERPRINTING AND DIAGNOSTICS	Centre for DNA Fingerprinting and Diagnostics	2020-05-30	public	SRX9834705	India	Asia	India:Telangana	COVID-19	Homo sapiens	Illumina MiSeq	18.11 N 79.01 E	PAIRED	PCR	VIRAL RNA	Severe acute respiratory syndrome coronavirus 2	2021-01-12T00:00:00Z	SRP301438
SRR13418848	WGA	421	260906208	PRJNA691556	SAMN17295733	Pathogen.cl	102003815	CENTRE FOR DNA FINGERPRINTING AND DIAGNOSTICS	Centre for DNA Fingerprinting and Diagnostics	2020-05-27	public	SRX9834608	India	Asia	India:Telangana	COVID-19	Homo sapiens	Illumina MiSeq	18.11 N 79.01 E	PAIRED	PCR	VIRAL RNA	Severe acute respiratory syndrome coronavirus 2	2021-01-12T00:00:00Z	SRP301438
SRR13418683	WGA	407	260980196	PRJNA691556	SAMN17295656	Pathogen.cl	93522415	CENTRE FOR DNA FINGERPRINTING AND DIAGNOSTICS	Centre for DNA Fingerprinting and Diagnostics	2020-06-18	public	SRX9834773	India	Asia	India:Telangana	COVID-19	Homo sapiens	Illumina MiSeq	18.11 N 79.01 E	PAIRED	PCR	VIRAL RNA	Severe acute respiratory syndrome coronavirus 2	2021-01-12T00:00:00Z	SRP301438
SRR13418760	WGA	422	265215316	PRJNA691556	SAMN17295763	Pathogen.cl	97965666	CENTRE FOR DNA FINGERPRINTING AND DIAGNOSTICS	Nizams Institute of Medical Sciences	2020-05-28	public	SRX9834696	India	Asia	India:Telangana	COVID-19	Homo sapiens	Illumina MiSeq	18.11 N 79.01 E	PAIRED	PCR	VIRAL RNA	Severe acute respiratory syndrome coronavirus 2	2021-01-12T00:00:00Z	SRP301438
SRR13418754	WGA	420	268311037	PRJNA691556	SAMN17295598	Pathogen.cl	110361398	CENTRE FOR DNA FINGERPRINTING AND DIAGNOSTICS	Centre for DNA Fingerprinting and Diagnostics	2020-05-30	public	SRX9834702	India	Asia	India:Telangana	COVID-19	Homo sapiens	Illumina MiSeq	18.11 N 79.01 E	PAIRED	PCR	VIRAL RNA	Severe acute respiratory syndrome coronavirus 2	2021-01-12T00:00:00Z	SRP301438
SRR13418782	WGA	421	270641112	PRJNA691556	SAMN17295585	Pathogen.cl	113364542	CENTRE FOR DNA FINGERPRINTING AND DIAGNOSTICS	Centre for DNA Fingerprinting and Diagnostics	2020-05-28	public	SRX9834674	India	Asia	India:Telangana	COVID-19	Homo sapiens	Illumina MiSeq	18.11 N 79.01 E	PAIRED	PCR	VIRAL RNA	Severe acute respiratory syndrome coronavirus 2	2021-01-12T00:00:00Z	SRP301438
SRR13418711	WGA	421	272014781	PRJNA691556	SAMN17295741	Pathogen.cl	98682565	CENTRE FOR DNA FINGERPRINTING AND DIAGNOSTICS	Nizams Institute of Medical Sciences	2020-04-14	public	SRX9834745	India	Asia	India:Telangana	COVID-19	Homo sapiens	Illumina MiSeq	18.11 N 79.01 E	PAIRED	PCR	VIRAL RNA	Severe acute respiratory syndrome coronavirus 2	2021-01-12T00:00:00Z	SRP301438
SRR13418728	WGA	209	272332592	PRJNA691556	SAMN17295720	Pathogen.cl	166266256	CENTRE FOR DNA FINGERPRINTING AND DIAGNOSTICS	Centre for DNA Fingerprinting and Diagnostics	2020-05-12	public	SRX9834728	India	Asia	India:Telangana	COVID-19	Homo sapiens	Illumina MiSeq	18.11 N 79.01 E	PAIRED	PCR	VIRAL RNA	Severe acute respiratory syndrome coronavirus 2	2021-01-12T00:00:00Z	SRP301438
SRR13418770	WGA	419	290255248	PRJNA691556	SAMN17295589	Pathogen.cl	112250978	CENTRE FOR DNA FINGERPRINTING AND DIAGNOSTICS	Centre for DNA Fingerprinting and Diagnostics	2020-05-29	public	SRX9834686	India	Asia	India:Telangana	COVID-19	Homo sapiens	Illumina MiSeq	18.11 N 79.01 E	PAIRED	PCR	VIRAL RNA	Severe acute respiratory syndrome coronavirus 2	2021-01-12T00:00:00Z	SRP301438
SRR13418732	WGA	492	291505387	PRJNA691556	SAMN17295608	Pathogen.cl	128898608	CENTRE FOR DNA FINGERPRINTING AND DIAGNOSTICS	Centre for DNA Fingerprinting and Diagnostics	2020-05-30	public	SRX9834724	India	Asia	India:Telangana	COVID-19	Homo sapiens	Illumina MiSeq	18.11 N 79.01 E	PAIRED	PCR	VIRAL RNA	Severe acute respiratory syndrome coronavirus 2	2021-01-12T00:00:00Z	SRP301438
SRR13418757	WGA	423	298059358	PRJNA691556	SAMN17295594	Pathogen.cl	113849086	CENTRE FOR DNA FINGERPRINTING AND DIAGNOSTICS	Centre for DNA Fingerprinting and Diagnostics	2020-05-30	public	SRX9834699	India	Asia	India:Telangana	COVID-19	Homo sapiens	Illumina MiSeq	18.11 N 79.01 E	PAIRED	PCR	VIRAL RNA	Severe acute respiratory syndrome coronavirus 2	2021-01-12T00:00:00Z	SRP301438
SRR13418756	WGA	423	299924153	PRJNA691556	SAMN17295595	Pathogen.cl	113142774	CENTRE FOR DNA FINGERPRINTING AND DIAGNOSTICS	Centre for DNA Fingerprinting and Diagnostics	2020-05-30	public	SRX9834700	India	Asia	India:Telangana	COVID-19	Homo sapiens	Illumina MiSeq	18.11 N 79.01 E	PAIRED	PCR	VIRAL RNA	Severe acute respiratory syndrome coronavirus 2	2021-01-12T00:00:00Z	SRP301438
SRR13418709	WGA	420	301477056	PRJNA691556	SAMN17295743	Pathogen.cl	112332905	CENTRE FOR DNA FINGERPRINTING AND DIAGNOSTICS	Nizams Institute of Medical Sciences	2020-04-14	public	SRX9834747	India	Asia	India:Telangana	COVID-19	Homo sapiens	Illumina MiSeq	18.11 N 79.01 E	PAIRED	PCR	VIRAL RNA	Severe acute respiratory syndrome coronavirus 2	2021-01-12T00:00:00Z	SRP301438
SRR13418735	WGA	490	325134447	PRJNA691556	SAMN17295597	Pathogen.cl	141575178	CENTRE FOR DNA FINGERPRINTING AND DIAGNOSTICS	Centre for DNA Fingerprinting and Diagnostics	2020-05-30	public	SRX9834721	India	Asia	India:Telangana	COVID-19	Homo sapiens	Illumina MiSeq	18.11 N 79.01 E	PAIRED	PCR	VIRAL RNA	Severe acute respiratory syndrome coronavirus 2	2021-01-12T00:00:00Z	SRP301438
SRR13418681	WGA	408	328445188	PRJNA691556	SAMN17295670	Pathogen.cl	117590120	CENTRE FOR DNA FINGERPRINTING AND DIAGNOSTICS	Centre for DNA Fingerprinting and Diagnostics	2020-06-20	public	SRX9834775	India	Asia	India:Telangana	COVID-19	Homo sapiens	Illumina MiSeq	18.11 N 79.01 E	PAIRED	PCR	VIRAL RNA	Severe acute respiratory syndrome coronavirus 2	2021-01-12T00:00:00Z	SRP301438
SRR13418733	WGA	490	331007380	PRJNA691556	SAMN17295607	Pathogen.cl	145719553	CENTRE FOR DNA FINGERPRINTING AND DIAGNOSTICS	Centre for DNA Fingerprinting and Diagnostics	2020-05-30	public	SRX9834723	India	Asia	India:Telangana	COVID-19	Homo sapiens	Illumina MiSeq	18.11 N 79.01 E	PAIRED	PCR	VIRAL RNA	Severe acute respiratory syndrome coronavirus 2	2021-01-12T00:00:00Z	SRP301438
SRR13418744	WGA	493	350173450	PRJNA691556	SAMN17295723	Pathogen.cl	153173149	CENTRE FOR DNA FINGERPRINTING AND DIAGNOSTICS	Centre for DNA Fingerprinting and Diagnostics	2020-05-12	public	SRX9834712	India	Asia	India:Telangana	COVID-19	Homo sapiens	Illumina MiSeq	18.11 N 79.01 E	PAIRED	PCR	VIRAL RNA	Severe acute respiratory syndrome coronavirus 2	2021-01-12T00:00:00Z	SRP301438
SRR13418720	WGA	493	355606655	PRJNA691556	SAMN17295619	Pathogen.cl	156310357	CENTRE FOR DNA FINGERPRINTING AND DIAGNOSTICS	Centre for DNA Fingerprinting and Diagnostics	2020-06-06	public	SRX9834736	India	Asia	India:Telangana	COVID-19	Homo sapiens	Illumina MiSeq	18.11 N 79.01 E	PAIRED	PCR	VIRAL RNA	Severe acute respiratory syndrome coronavirus 2	2021-01-12T00:00:00Z	SRP301438
SRR13418737	WGA	457	381955426	PRJNA691556	SAMN17295590	Pathogen.cl	178837113	CENTRE FOR DNA FINGERPRINTING AND DIAGNOSTICS	Centre for DNA Fingerprinting and Diagnostics	2020-05-29	public	SRX9834719	India	Asia	India:Telangana	COVID-19	Homo sapiens	Illumina MiSeq	18.11 N 79.01 E	PAIRED	PCR	VIRAL RNA	Severe acute respiratory syndrome coronavirus 2	2021-01-12T00:00:00Z	SRP301438
SRR13418738	WGA	463	387509081	PRJNA691556	SAMN17295588	Pathogen.cl	183164768	CENTRE FOR DNA FINGERPRINTING AND DIAGNOSTICS	Centre for DNA Fingerprinting and Diagnostics	2020-05-28	public	SRX9834718	India	Asia	India:Telangana	COVID-19	Homo sapiens	Illumina MiSeq	18.11 N 79.01 E	PAIRED	PCR	VIRAL RNA	Severe acute respiratory syndrome coronavirus 2	2021-01-12T00:00:00Z	SRP301438
SRR13418736	WGA	455	403825320	PRJNA691556	SAMN17295591	Pathogen.cl	190656001	CENTRE FOR DNA FINGERPRINTING AND DIAGNOSTICS	Centre for DNA Fingerprinting and Diagnostics	2020-05-29	public	SRX9834720	India	Asia	India:Telangana	COVID-19	Homo sapiens	Illumina MiSeq	18.11 N 79.01 E	PAIRED	PCR	VIRAL RNA	Severe acute respiratory syndrome coronavirus 2	2021-01-12T00:00:00Z	SRP301438
SRR13418727	WGA	478	417988697	PRJNA691556	SAMN17295612	Pathogen.cl	184452381	CENTRE FOR DNA FINGERPRINTING AND DIAGNOSTICS	Centre for DNA Fingerprinting and Diagnostics	2020-06-03	public	SRX9834729	India	Asia	India:Telangana	COVID-19	Homo sapiens	Illumina MiSeq	18.11 N 79.01 E	PAIRED	PCR	VIRAL RNA	Severe acute respiratory syndrome coronavirus 2	2021-01-12T00:00:00Z	SRP301438
SRR13418729	WGA	482	419113249	PRJNA691556	SAMN17295611	Pathogen.cl	186601188	CENTRE FOR DNA FINGERPRINTING AND DIAGNOSTICS	Centre for DNA Fingerprinting and Diagnostics	2020-06-03	public	SRX9834727	India	Asia	India:Telangana	COVID-19	Homo sapiens	Illumina MiSeq	18.11 N 79.01 E	PAIRED	PCR	VIRAL RNA	Severe acute respiratory syndrome coronavirus 2	2021-01-12T00:00:00Z	SRP301438
SRR13418716	WGA	491	424214503	PRJNA691556	SAMN17295622	Pathogen.cl	184009247	CENTRE FOR DNA FINGERPRINTING AND DIAGNOSTICS	Centre for DNA Fingerprinting and Diagnostics	2020-06-08	public	SRX9834740	India	Asia	India:Telangana	COVID-19	Homo sapiens	Illumina MiSeq	18.11 N 79.01 E	PAIRED	PCR	VIRAL RNA	Severe acute respiratory syndrome coronavirus 2	2021-01-12T00:00:00Z	SRP301438
SRR13418724	WGA	492	424743177	PRJNA691556	SAMN17295615	Pathogen.cl	182683804	CENTRE FOR DNA FINGERPRINTING AND DIAGNOSTICS	Centre for DNA Fingerprinting and Diagnostics	2020-06-06	public	SRX9834732	India	Asia	India:Telangana	COVID-19	Homo sapiens	Illumina MiSeq	18.11 N 79.01 E	PAIRED	PCR	VIRAL RNA	Severe acute respiratory syndrome coronavirus 2	2021-01-12T00:00:00Z	SRP301438
SRR13418726	WGA	487	425261480	PRJNA691556	SAMN17295613	Pathogen.cl	185596341	CENTRE FOR DNA FINGERPRINTING AND DIAGNOSTICS	Centre for DNA Fingerprinting and Diagnostics	2020-06-04	public	SRX9834730	India	Asia	India:Telangana	COVID-19	Homo sapiens	Illumina MiSeq	18.11 N 79.01 E	PAIRED	PCR	VIRAL RNA	Severe acute respiratory syndrome coronavirus 2	2021-01-12T00:00:00Z	SRP301438
SRR13418722	WGA	487	429030746	PRJNA691556	SAMN17295617	Pathogen.cl	187997457	CENTRE FOR DNA FINGERPRINTING AND DIAGNOSTICS	Centre for DNA Fingerprinting and Diagnostics	2020-06-06	public	SRX9834734	India	Asia	India:Telangana	COVID-19	Homo sapiens	Illumina MiSeq	18.11 N 79.01 E	PAIRED	PCR	VIRAL RNA	Severe acute respiratory syndrome coronavirus 2	2021-01-12T00:00:00Z	SRP301438
SRR13418725	WGA	470	438680207	PRJNA691556	SAMN17295614	Pathogen.cl	195327788	CENTRE FOR DNA FINGERPRINTING AND DIAGNOSTICS	Centre for DNA Fingerprinting and Diagnostics	2020-06-06	public	SRX9834731	India	Asia	India:Telangana	COVID-19	Homo sapiens	Illumina MiSeq	18.11 N 79.01 E	PAIRED	PCR	VIRAL RNA	Severe acute respiratory syndrome coronavirus 2	2021-01-12T00:00:00Z	SRP301438
SRR13418723	WGA	491	457832756	PRJNA691556	SAMN17295616	Pathogen.cl	198701466	CENTRE FOR DNA FINGERPRINTING AND DIAGNOSTICS	Centre for DNA Fingerprinting and Diagnostics	2020-06-06	public	SRX9834733	India	Asia	India:Telangana	COVID-19	Homo sapiens	Illumina MiSeq	18.11 N 79.01 E	PAIRED	PCR	VIRAL RNA	Severe acute respiratory syndrome coronavirus 2	2021-01-12T00:00:00Z	SRP301438
SRR13418734	WGA	487	459879012	PRJNA691556	SAMN17295606	Pathogen.cl	198578301	CENTRE FOR DNA FINGERPRINTING AND DIAGNOSTICS	Centre for DNA Fingerprinting and Diagnostics	2020-05-30	public	SRX9834722	India	Asia	India:Telangana	COVID-19	Homo sapiens	Illumina MiSeq	18.11 N 79.01 E	PAIRED	PCR	VIRAL RNA	Severe acute respiratory syndrome coronavirus 2	2021-01-12T00:00:00Z	SRP301438
SRR13418721	WGA	487	581521718	PRJNA691556	SAMN17295618	Pathogen.cl	257932448	CENTRE FOR DNA FINGERPRINTING AND DIAGNOSTICS	Centre for DNA Fingerprinting and Diagnostics	2020-06-06	public	SRX9834735	India	Asia	India:Telangana	COVID-19	Homo sapiens	Illumina MiSeq	18.11 N 79.01 E	PAIRED	PCR	VIRAL RNA	Severe acute respiratory syndrome coronavirus 2	2021-01-12T00:00:00Z	SRP301438
